# Supplementary material for: Genetic variant pathogenicity prediction trained using disease-specific clinical sequencing data sets
Source: HighWire-hosted journal article supplement (doi:10.1101/gr.240994.118), 2019-06-24
Supplement: Supplemental_Code.zip [file clinvar_eval.xls]

chrom	pos	ref	alt	pfam	eff	clinSig	af_1kg_all	gene	mpc	mtr	Protein_Change	y	key	not_in_training	is_focus	path_frac_t	size_t	path_freq	benign_freq	path_na_t	in_none_pfam	tree_pred	tree_correct
1	43392789	G	A	Sugar_tr:28	missense_variant	5	0.0	SLC2A1	1.9939	0.7593	R468W	1	1:43392789:G:A	True	True	-1.0	5.0	0.0	0.0	1	0	1.6056727719954172e-05	wrong
1	43393286	T	C	MFS_1:44,Sugar_tr:29	missense_variant	3	0.0	SLC2A1	1.9333	0.7857	Q423R	0	1:43393286:T:C	True	True	1.0	9.0	0.0005938242280285036	0.0	0	0	0.9971537540884157	wrong
1	43393338	C	T	MFS_1:44,Sugar_tr:29	missense_variant	4	0.00059904	SLC2A1	1.8253	0.7537	V406I	1	1:43393338:C:T	True	True	1.0	9.0	0.0005938242280285036	0.0	0	0	0.9967189748413455	right
1	43394680	G	A	MFS_1:45,Sugar_tr:30	missense_variant	5|5	0.0	SLC2A1	2.065	0.6945	R333W	1	1:43394680:G:A	True	True	1.0	3.0	0.00023752969121140142	0.0	0	0	0.9998503863117264	right
1	43394695	C	A	MFS_1:45,Sugar_tr:30	missense_variant	4	0.0	SLC2A1	1.6817	0.6884	V328L	1	1:43394695:C:A	True	True	1.0	3.0	0.00023752969121140142	0.0	0	0	0.9994649955575116	right
1	43394913	C	T	MFS_1:46,Sugar_tr:31	missense_variant	5|5|5|5	0.0	SLC2A1	2.0092	0.7296	G314S	1	1:43394913:C:T	True	True	1.0	5.0	0.00047505938242280285	0.0	0	0	0.9995181636467002	right
1	43395274	C	T	MFS_1:47,Sugar_tr:32	missense_variant	5	0.0	SLC2A1	2.2569	0.7407	G286D	1	1:43395274:C:T	True	True	1.0	10.0	0.0010688836104513065	0.0	0	0	0.997575145323711	right
1	43395326	G	A	MFS_1:47,Sugar_tr:32	missense_variant	4	0.0	SLC2A1	2.2986	0.7212	R269C	1	1:43395326:G:A	True	True	1.0	10.0	0.0010688836104513065	0.0	0	0	0.9977721017525735	right
1	43395385	C	T	MFS_1:47,Sugar_tr:32	missense_variant	3	0.0	SLC2A1	1.0557	0.7844	R249Q	0	1:43395385:C:T	True	True	1.0	10.0	0.0010688836104513065	0.0	0	0	0.9915652716655754	wrong
1	43395589	G	A	MFS_1:48,Sugar_tr:33	missense_variant	5	0.0	SLC2A1	2.2743	0.75	R212C	1	1:43395589:G:A	True	True	1.0	4.0	0.00023752969121140142	0.0	0	0	0.9998861073290459	right
1	43396377	C	T	MFS_1:49,Sugar_tr:34	missense_variant	5	0.0	SLC2A1	2.1291	0.7074	E146K	1	1:43396377:C:T	True	True	1.0	12.0	0.0011876484560570072	0.0	0	0	0.993829898432192	right
1	43396425	C	T	MFS_1:49,Sugar_tr:34	missense_variant	5	0.0	SLC2A1	2.0294	0.7353	G130S	1	1:43396425:C:T	True	True	1.0	12.0	0.0011876484560570072	0.0	0	0	0.9932031279757981	right
1	43396436	C	T	MFS_1:49,Sugar_tr:34	missense_variant	5|5|5	0.0	SLC2A1	2.2357	0.7316	R126H	1	1:43396436:C:T	True	True	1.0	12.0	0.0011876484560570072	0.0	0	0	0.9945818346143762	right
1	43396436	C	A	MFS_1:49,Sugar_tr:34	missense_variant	5	0.0	SLC2A1	2.2357	0.7316	R126L	1	1:43396436:C:A	True	True	1.0	12.0	0.0011876484560570072	0.0	0	0	0.9945818346143762	right
1	43396536	G	A	MFS_1:49,Sugar_tr:34	missense_variant	5	0.0	SLC2A1	2.0536	0.7329	R93W	1	1:43396536:G:A	True	True	1.0	12.0	0.0011876484560570072	0.0	0	0	0.9933480145208935	right
1	43396718	G	A	MFS_1:50,Sugar_tr:35	missense_variant	5	0.0	SLC2A1	2.0675	0.7437	R92W	1	1:43396718:G:A	True	True	1.0	1.0	0.00011876484560570071	0.0	0	0	0.9999506461228238	right
1	43396720	C	T	MFS_1:50,Sugar_tr:35	missense_variant	5	0.0	SLC2A1	2.2782	0.7437	G91D	1	1:43396720:C:T	True	True	1.0	1.0	0.00011876484560570071	0.0	0	0	0.9999831769305599	right
1	43408910	T	A	Sugar_tr:36	missense_variant	5	0.0	SLC2A1	2.2375	0.7632	N34I	1	1:43408910:T:A	True	True	1.0	4.0	0.00023752969121140142	0.0	0	0	0.9998676774548503	right
1	43408911	T	C	Sugar_tr:36	missense_variant	4	0.0	SLC2A1	2.142	0.7632	N34D	1	1:43408911:T:C	True	True	1.0	4.0	0.00023752969121140142	0.0	0	0	0.9998092907559426	right
2	166152389	G	A	none219422,none219423,none219424	missense_variant	3	0.0839	SCN2A	0.8557	0.7444	R19K	0	2:166152389:G:A	True	True	-1.0	7.0	0.0	0.0	1	1	0.00020949302938900975	right
2	166165261	C	T	Ion_trans:473	missense_variant	5	0.0	SCN2A	1.9939	0.7887	R188W	1	2:166165261:C:T	True	True	0.0	2.0	0.0	0.00011899095668729176	0	0	0.08042885599275415	wrong
2	166166889	A	G	Ion_trans:476	missense_variant	5	0.0	SCN2A	1.9568	0.737	M252V	1	2:166166889:A:G	True	True	1.0	4.0	0.00023798191337458352	0.0	0	0	0.999643969446083	right
2	166166923	C	T	Ion_trans:476	missense_variant	5|5|5	0.0	SCN2A	1.9474	0.763	A263V	1	2:166166923:C:T	True	True	1.0	4.0	0.00023798191337458352	0.0	0	0	0.9996334525819576	right
2	166166925	C	G	Ion_trans:476	missense_variant	5	0.0	SCN2A	1.963	0.7658	L264V	1	2:166166925:C:G	True	True	1.0	4.0	0.00023798191337458352	0.0	0	0	0.9996507835513275	right
2	166166986	A	G	Ion_trans:476	missense_variant	5	0.0	SCN2A	1.082	0.7948	D284G	1	2:166166986:A:G	True	True	1.0	4.0	0.00023798191337458352	0.0	0	0	0.9969443717325622	right
2	166168546	T	G	Ion_trans:477	missense_variant	3	0.0	SCN2A	1.0789	0.8251	F328V	0	2:166168546:T:G	True	True	0.0	2.0	0.0	0.00011899095668729176	0	0	0.06203431225695781	right
2	166170242	C	G	Ion_trans:478	missense_variant	5	0.0	SCN2A	2.03	0.7753	Q383E	1	2:166170242:C:G	True	True	1.0	3.0	0.00011899095668729176	0.0	0	0	0.9998292494010139	right
2	166187996	T	C	none219446,none219447,none219448	missense_variant	5	0.0	SCN2A	2.1713	0.7766	I769T	1	2:166187996:T:C	True	True	0.8333333333333334	26.0	0.0008329366968110423	0.00011899095668729176	0	1	0.9153761139512276	right
2	166201069	G	A	Ion_trans:482	missense_variant	4	0.0	SCN2A	3.3059	0.7132	R856Q	1	2:166201069:G:A	True	True	0.9285714285714286	16.0	0.0015468824369347927	0.00011899095668729176	0	0	0.9986510278605373	right
2	166201197	G	A	Ion_trans:482	missense_variant	4	0.0	SCN2A	3.0437	0.7761	G899S	1	2:166201197:G:A	True	True	0.9285714285714286	16.0	0.0015468824369347927	0.00011899095668729176	0	0	0.9936042243515241	right
2	166210742	G	T	none219458,none219459,none219460	missense_variant	5|4	0.0	SCN2A	2.1568	0.7782	S987I	1	2:166210742:G:T	True	True	1.0	1.0	0.0003569728700618753	0.0	0	1	0.9999680711213523	right
2	166210777	G	A	Na_trans_assoc:9	missense_variant	5	0.0	SCN2A	1.9144	0.8022	E999K	1	2:166210777:G:A	True	True	1.0	6.0	0.00047596382674916705	0.0	0	0	0.9990532002239203	right
2	166210789	C	A	Na_trans_assoc:9	missense_variant	5	0.0	SCN2A	1.5779	0.8015	L1003I	1	2:166210789:C:A	True	True	1.0	6.0	0.00047596382674916705	0.0	0	0	0.9981463698655865	right
2	166221687	C	T	Na_trans_assoc:10	missense_variant	4	0.0	SCN2A	2.0786	0.7623	T1145M	1	2:166221687:C:T	True	True	1.0	3.0	0.00023798191337458352	0.0	0	0	0.9998580059759574	right
2	166231210	C	T	Ion_trans:486	missense_variant	5	0.0	SCN2A	2.1384	0.7269	L1330F	1	2:166231210:C:T	True	True	1.0	9.0	0.001070918610185626	0.0	0	0	0.9979847576421909	right
2	166231219	G	A	Ion_trans:486	missense_variant	4	0.0	SCN2A	2.0396	0.7417	A1333T	1	2:166231219:G:A	True	True	1.0	9.0	0.001070918610185626	0.0	0	0	0.9976016264809889	right
2	166234116	A	G	Ion_trans:487	missense_variant	4	0.0	SCN2A	2.1919999999999997	0.7434	K1422E	1	2:166234116:A:G	True	True	1.0	2.0	0.00011899095668729176	0.0	0	0	0.9999504632964045	right
2	166237187	T	G	Ion_trans:488	missense_variant	4	0.0	SCN2A	2.5763	0.7993	L1465W	1	2:166237187:T:G	True	True	-1.0	2.0	0.0	0.0	1	0	0.0001940723379986361	wrong
2	166237212	A	G	none219482,none219483,none219484	missense_variant	5	0.0	SCN2A	1.109	0.8029999999999999	I1473M	1	2:166237212:A:G	True	True	1.0	13.0	0.0005949547834364588	0.0	0	1	0.986607411968978	right
2	166243391	C	G	none219482,none219483,none219484	missense_variant	5	0.0	SCN2A	2.0805	0.8022	L1563V	1	2:166243391:C:G	True	True	1.0	13.0	0.0005949547834364588	0.0	0	1	0.9909383970052926	right
2	166243455	C	T	Ion_trans:489	missense_variant	4	0.0	SCN2A	2.0862	0.7632	S1584F	1	2:166243455:C:T	True	True	1.0	5.0	0.00047596382674916705	0.0	0	0	0.9996168049447258	right
2	166245211	G	A	Ion_trans:490	missense_variant	5	0.0	SCN2A	0.9624	0.7048	R1632K	1	2:166245211:G:A	True	True	1.0	8.0	0.0008329366968110424	0.0	0	0	0.9930707455293052	right
2	166245217	G	A	Ion_trans:490	missense_variant	4	0.0	SCN2A	2.3102	0.6898	G1634D	1	2:166245217:G:A	True	True	1.0	8.0	0.0008329366968110424	0.0	0	0	0.9991311404184124	right
2	166245633	G	A	Ion_trans:490	missense_variant	4	0.0	SCN2A	2.0396	0.7749	A1773T	1	2:166245633:G:A	True	True	1.0	8.0	0.0008329366968110424	0.0	0	0	0.9983708775723728	right
2	166245961	G	A	none219488,none219489,none219490	missense_variant	4|4|5	0.0	SCN2A	2.2044	0.7736	R1882Q	1	2:166245961:G:A	True	True	0.0	13.0	0.0	0.001070918610185626	0	1	0.03487870041772192	wrong
2	166246252	C	T	none219491,none219492,none219493	missense_variant	4	0.0	SCN2A	2.1291	0.7871	T1979I	1	2:166246252:C:T	True	True	0.0	0.0	0.0	0.0	1	1	0.13780734590066332	vus
2	166847921	A	G	none219512,none219513,none219514,none219515,none219516,none219517,none219518,none219519,none219520,none219521,none219522,none219523,none219524,none219525,none219526,none219527,none219528	missense_variant	2	0.007587899999999999	SCN1A	0.905	0.8037	I1955T	0	2:166847921:A:G	True	True	0.92	42.0	0.003093764873869585	0.003093764873869586	0	1	0.44525382733951346	vus
2	166848005	C	G	none219512,none219513,none219514,none219515,none219516,none219517,none219518,none219519,none219520,none219521,none219522,none219523,none219524,none219525,none219526,none219527,none219528	missense_variant	5	0.0	SCN1A	2.0894	0.7443	R1927T	1	2:166848005:C:G	True	True	0.92	42.0	0.003093764873869585	0.003093764873869586	0	1	0.9989771851907608	right
2	166848165	G	A	none219512,none219513,none219514,none219515,none219516,none219517,none219518,none219519,none219520,none219521,none219522,none219523,none219524,none219525,none219526,none219527,none219528	missense_variant	4	0.0	SCN1A	1.8115	0.7621	R1874W	1	2:166848165:G:A	True	True	0.92	42.0	0.003093764873869585	0.003093764873869586	0	1	0.9967958901801691	right
2	166848230	A	G	none219512,none219513,none219514,none219515,none219516,none219517,none219518,none219519,none219520,none219521,none219522,none219523,none219524,none219525,none219526,none219527,none219528	missense_variant	1|5	0.0	SCN1A	1.9127	0.7701	M1852T	1	2:166848230:A:G	True	True	0.92	42.0	0.003093764873869585	0.003093764873869586	0	1	0.9979359184457114	right
2	166848270	G	C	none219512,none219513,none219514,none219515,none219516,none219517,none219518,none219519,none219520,none219521,none219522,none219523,none219524,none219525,none219526,none219527,none219528	missense_variant	5	0.0	SCN1A	1.7861	0.7687	L1839V	1	2:166848270:G:C	True	True	0.92	42.0	0.003093764873869585	0.003093764873869586	0	1	0.9964038928091863	right
2	166848439	G	C	Ion_trans:491	missense_variant	5	0.0	SCN1A	1.7959	0.7684	I1782M	1	2:166848439:G:C	True	True	1.0	31.0	0.003807710613993335	0.0	0	0	0.9690095104306944	right
2	166848521	T	C	Ion_trans:491	missense_variant	5	0.0	SCN1A	2.0396	0.7799	D1755G	1	2:166848521:T:C	True	True	1.0	31.0	0.003807710613993335	0.0	0	0	0.9749214118625019	right
2	166848644	A	G	Ion_trans:491	missense_variant	4|4	0.0	SCN1A	1.6837	0.7978	M1714T	1	2:166848644:A:G	True	True	1.0	31.0	0.003807710613993335	0.0	0	0	0.9647177890640345	right
2	166848659	G	A	Ion_trans:491	missense_variant	5|5	0.0	SCN1A	1.7919	0.8015	T1709I	1	2:166848659:G:A	True	True	1.0	31.0	0.003807710613993335	0.0	0	0	0.9688790512484388	right
2	166848677	T	A	Ion_trans:491	missense_variant	5	0.0	SCN1A	2.0189	0.8168	D1703V	1	2:166848677:T:A	True	True	1.0	31.0	0.003807710613993335	0.0	0	0	0.9745331406447032	right
2	166848679	A	T	Ion_trans:491	missense_variant	5	0.0	SCN1A	1.6183	0.8168	D1702E	1	2:166848679:A:T	True	True	1.0	31.0	0.003807710613993335	0.0	0	0	0.9614646933066587	right
2	166848681	C	A	Ion_trans:491	missense_variant	4	0.0	SCN1A	1.9507	0.8168	D1702Y	1	2:166848681:C:A	True	True	1.0	31.0	0.003807710613993335	0.0	0	0	0.9731377663875536	right
2	166848722	C	A	Ion_trans:491	missense_variant	5	0.0	SCN1A	1.9797	0.7729	G1688V	1	2:166848722:C:A	True	True	1.0	31.0	0.003807710613993335	0.0	0	0	0.9737550255154435	right
2	166848771	T	G	Ion_trans:491	missense_variant	5	0.0	SCN1A	1.8044	0.7527	N1672H	1	2:166848771:T:G	True	True	1.0	31.0	0.003807710613993335	0.0	0	0	0.9692819892041663	right
2	166848782	G	C	Ion_trans:491	missense_variant	5	0.0	SCN1A	1.8211	0.7464	P1668R	1	2:166848782:G:C	True	True	1.0	31.0	0.003807710613993335	0.0	0	0	0.9697991976897958	right
2	166848788	G	A	Ion_trans:491	missense_variant	5	0.0	SCN1A	1.8309	0.7409	S1666F	1	2:166848788:G:A	True	True	1.0	31.0	0.003807710613993335	0.0	0	0	0.970092000007129	right
2	166848800	G	A	Ion_trans:491	missense_variant	5	0.0	SCN1A	1.7589	0.7226	A1662V	1	2:166848800:G:A	True	True	1.0	31.0	0.003807710613993335	0.0	0	0	0.9677450222189805	right
2	166848812	G	A	Ion_trans:491	missense_variant	5	0.0	SCN1A	1.8071	0.7289	T1658M	1	2:166848812:G:A	True	True	1.0	31.0	0.003807710613993335	0.0	0	0	0.9693672155812556	right
2	166848817	G	C	Ion_trans:491	missense_variant	5|1	0.0	SCN1A	1.7936	0.7216	I1656M	1	2:166848817:G:C	True	True	1.0	31.0	0.003807710613993335	0.0	0	0	0.9689346734445462	right
2	166848843	G	A	Ion_trans:491	missense_variant	5	0.0	SCN1A	2.0749	0.6923	R1648C	1	2:166848843:G:A	True	True	1.0	31.0	0.003807710613993335	0.0	0	0	0.9755529729429927	right
2	166848851	C	G	Ion_trans:491	missense_variant	5	0.0	SCN1A	2.1249	0.6825	R1645P	1	2:166848851:C:G	True	True	1.0	31.0	0.003807710613993335	0.0	0	0	0.9763937825358733	right
2	166848878	C	T	Ion_trans:491	missense_variant	1|4|5	0.0	SCN1A	1.8659999999999999	0.7085	R1636Q	1	2:166848878:C:T	True	True	1.0	31.0	0.003807710613993335	0.0	0	0	0.9710805717131272	right
2	166850677	C	A	Ion_trans:492	missense_variant	5|5	0.0	SCN1A	2.0448	0.7741	V1611F	1	2:166850677:C:A	True	True	1.0	7.0	0.001070918610185626	0.0	0	0	0.9989388861923463	right
2	166850686	C	A	Ion_trans:492	missense_variant	5	0.0	SCN1A	1.9772	0.7675	D1608Y	1	2:166850686:C:A	True	True	1.0	7.0	0.001070918610185626	0.0	0	0	0.998770449955934	right
2	166850727	G	T	Ion_trans:492	missense_variant	5	0.0	SCN1A	2.0173	0.7649	S1594Y	1	2:166850727:G:T	True	True	1.0	7.0	0.001070918610185626	0.0	0	0	0.9988718121660359	right
2	166850742	A	C	Ion_trans:492	missense_variant	5	0.0	SCN1A	1.9857	0.7368	V1589G	1	2:166850742:A:C	True	True	1.0	7.0	0.001070918610185626	0.0	0	0	0.9987922843508047	right
2	166850751	C	T	Ion_trans:492	missense_variant	5	0.0	SCN1A	2.0305	0.7313	G1586E	1	2:166850751:C:T	True	True	1.0	7.0	0.001070918610185626	0.0	0	0	0.9989042578256795	right
2	166852557	G	C	none219546,none219547,none219548,none219549,none219550,none219551,none219552,none219553,none219554,none219555,none219556,none219557,none219558,none219559,none219560,none219561,none219562	missense_variant	5	0.0	SCN1A	2.0466	0.7929999999999999	S1516W	1	2:166852557:G:C	True	True	0.9285714285714286	20.0	0.001784864350309376	0.00011899095668729176	0	1	0.924403661323832	right
2	166852575	G	C	none219546,none219547,none219548,none219549,none219550,none219551,none219552,none219553,none219554,none219555,none219556,none219557,none219558,none219559,none219560,none219561,none219562	missense_variant	5	0.0	SCN1A	1.2011	0.8023	A1510G	1	2:166852575:G:C	True	True	0.9285714285714286	20.0	0.001784864350309376	0.00011899095668729176	0	1	0.9104355688081749	right
2	166852609	A	G	none219546,none219547,none219548,none219549,none219550,none219551,none219552,none219553,none219554,none219555,none219556,none219557,none219558,none219559,none219560,none219561,none219562	missense_variant	5	0.0	SCN1A	1.6777	0.8494	F1499L	1	2:166852609:A:G	True	True	0.9285714285714286	20.0	0.001784864350309376	0.00011899095668729176	0	1	0.9220158220123076	right
2	166854557	C	G	none219546,none219547,none219548,none219549,none219550,none219551,none219552,none219553,none219554,none219555,none219556,none219557,none219558,none219559,none219560,none219561,none219562	missense_variant	5	0.0	SCN1A	1.6984	0.8134	Q1489H	1	2:166854557:C:G	True	True	0.9285714285714286	20.0	0.001784864350309376	0.00011899095668729176	0	1	0.9221277368360126	right
2	166854559	G	T	none219546,none219547,none219548,none219549,none219550,none219551,none219552,none219553,none219554,none219555,none219556,none219557,none219558,none219559,none219560,none219561,none219562	missense_variant	5	0.0	SCN1A	1.0531	0.8134	Q1489K	1	2:166854559:G:T	True	True	0.9285714285714286	20.0	0.001784864350309376	0.00011899095668729176	0	1	0.8998856479762317	vus
2	166854580	T	G	Ion_trans:493	missense_variant	4	0.0	SCN1A	1.5074	0.8007	I1482L	1	2:166854580:T:G	True	True	0.8	8.0	0.00047596382674916705	0.00011899095668729176	0	0	0.8789534569194241	vus
2	166854612	G	A	Ion_trans:493	missense_variant	5	0.0	SCN1A	1.8584	0.7904	S1471F	1	2:166854612:G:A	True	True	0.8	8.0	0.00047596382674916705	0.00011899095668729176	0	0	0.914876120232858	right
2	166854631	T	C	Ion_trans:493	missense_variant	2	0.0017971	SCN1A	0.7218	0.7932	I1465V	0	2:166854631:T:C	True	True	0.8	8.0	0.00047596382674916705	0.00011899095668729176	0	0	0.7746089389061834	vus
2	166854639	T	C	Ion_trans:493	missense_variant	1|5	0.0	SCN1A	1.9919	0.7887	Y1462C	1	2:166854639:T:C	True	True	0.8	8.0	0.00047596382674916705	0.00011899095668729176	0	0	0.9293563459584675	right
2	166854673	G	T	Ion_trans:493	missense_variant	5	0.0	SCN1A	1.8813	0.7985	P1451T	1	2:166854673:G:T	True	True	0.8	8.0	0.00047596382674916705	0.00011899095668729176	0	0	0.9173338507026493	right
2	166856273	C	T	Ion_trans:494	missense_variant	5	0.0	SCN1A	2.0305	0.7707	G1433E	1	2:166856273:C:T	True	True	1.0	5.0	0.0005949547834364588	0.0	0	0	0.9995473344555529	right
2	166858983	A	G	Ion_trans:495	missense_variant	5|1	0.0	SCN1A	1.9355	0.7836	V1428A	1	2:166858983:A:G	True	True	1.0	10.0	0.0008329366968110424	0.0	0	0	0.9960263648712191	right
2	166859098	C	T	Ion_trans:495	missense_variant	5	0.0	SCN1A	1.7363	0.7941	V1390M	1	2:166859098:C:T	True	True	1.0	10.0	0.0008329366968110424	0.0	0	0	0.9951438366045512	right
2	166859098	C	G	Ion_trans:495	missense_variant	5	0.0	SCN1A	1.2818	0.7941	V1390L	1	2:166859098:C:G	True	True	1.0	10.0	0.0008329366968110424	0.0	0	0	0.9930541383362458	right
2	166859178	A	T	Ion_trans:495	missense_variant	5	0.0	SCN1A	2.3344	0.797	I1363N	1	2:166859178:A:T	True	True	1.0	10.0	0.0008329366968110424	0.0	0	0	0.9979243083087583	right
2	166859180	G	C	Ion_trans:495	missense_variant	5	0.0	SCN1A	1.8821	0.7934	S1362R	1	2:166859180:G:C	True	True	1.0	10.0	0.0008329366968110424	0.0	0	0	0.995783739927158	right
2	166859209	C	G	Ion_trans:495	missense_variant	5|1	0.0	SCN1A	1.696	0.7609999999999999	V1353L	1	2:166859209:C:G	True	True	1.0	10.0	0.0008329366968110424	0.0	0	0	0.9949711171891771	right
2	166859211	A	G	Ion_trans:495	missense_variant	5	0.0	SCN1A	2.2411	0.7582	L1352P	1	2:166859211:A:G	True	True	1.0	10.0	0.0008329366968110424	0.0	0	0	0.997483366522631	right
2	166859222	C	T	Ion_trans:495	missense_variant	5	0.0	SCN1A	0.8098	0.7546	M1348I	1	2:166859222:C:T	True	True	1.0	10.0	0.0008329366968110424	0.0	0	0	0.9888769976697647	right
2	166859250	G	A	Ion_trans:495	missense_variant	5	0.0	SCN1A	1.7751	0.7259	A1339V	1	2:166859250:G:A	True	True	1.0	10.0	0.0008329366968110424	0.0	0	0	0.9953114108059203	right
2	166859253	T	G	Ion_trans:495	missense_variant	5	0.0	SCN1A	1.7936	0.7196	N1338T	1	2:166859253:T:G	True	True	1.0	10.0	0.0008329366968110424	0.0	0	0	0.9953919040645567	right
2	166859263	C	T	Ion_trans:495	missense_variant	5	0.0	SCN1A	1.7836	0.7222	V1335M	1	2:166859263:C:T	True	True	1.0	10.0	0.0008329366968110424	0.0	0	0	0.9953483415094642	right
2	166866332	G	C	Ion_trans:496	missense_variant	5	0.0	SCN1A	1.7776	0.7433	T1300R	1	2:166866332:G:C	True	True	1.0	6.0	0.00023798191337458352	0.0	0	0	0.9987269983585296	right
2	166868638	A	G	Ion_trans:497	missense_variant	5	0.0	SCN1A	2.2411	0.7692	L1287P	1	2:166868638:A:G	True	True	1.0	5.0	0.00047596382674916705	0.0	0	0	0.9997715558029667	right
2	166868648	A	G	Ion_trans:497	missense_variant	4	0.0	SCN1A	2.3344	0.7743	W1284R	1	2:166868648:A:G	True	True	1.0	5.0	0.00047596382674916705	0.0	0	0	0.9998396586641451	right
2	166868677	T	G	Ion_trans:497	missense_variant	5	0.0	SCN1A	2.1159	0.7931	Y1274S	1	2:166868677:T:G	True	True	1.0	5.0	0.00047596382674916705	0.0	0	0	0.9996508430538702	right
2	166868680	G	A	Ion_trans:497	missense_variant	5	0.0	SCN1A	1.7726	0.7854	A1273V	1	2:166868680:G:A	True	True	1.0	5.0	0.00047596382674916705	0.0	0	0	0.9991106218735527	right
2	166868689	T	G	Ion_trans:497	missense_variant	5|1	0.0	SCN1A	1.9447	0.7863	K1270T	1	2:166868689:T:G	True	True	1.0	5.0	0.00047596382674916705	0.0	0	0	0.9994233844020957	right
2	166868735	C	G	Ion_trans:497	missense_variant	5	0.0	SCN1A	2.0311	0.7879	A1255P	1	2:166868735:C:G	True	True	1.0	5.0	0.00047596382674916705	0.0	0	0	0.9995477865719458	right
2	166868764	C	T	none219631,none219632,none219633,none219634,none219635,none219636,none219637,none219638,none219639,none219640,none219641,none219642,none219643,none219644,none219645,none219646,none219647	missense_variant	1|5	0.0	SCN1A	1.0705	0.7828	R1245Q	1	2:166868764:C:T	True	True	0.6666666666666666	5.0	0.00047596382674916705	0.00011899095668729176	0	1	0.5943705233989524	vus
2	166868792	C	G	none219631,none219632,none219633,none219634,none219635,none219636,none219637,none219638,none219639,none219640,none219641,none219642,none219643,none219644,none219645,none219646,none219647	missense_variant	5	0.0	SCN1A	2.0305	0.7859999999999999	A1236P	1	2:166868792:C:G	True	True	0.6666666666666666	5.0	0.00047596382674916705	0.00011899095668729176	0	1	0.8426849555757612	vus
2	166870276	A	C	Na_trans_assoc:12	missense_variant	4	0.0	SCN1A	2.1334	0.7934	I1228S	1	2:166870276:A:C	True	True	0.75	8.0	0.0003569728700618753	0.00011899095668729176	0	0	0.8976878952598489	vus
2	166870298	C	G	Na_trans_assoc:12	missense_variant	5	0.0	SCN1A	1.7667	0.7757	E1221Q	1	2:166870298:C:G	True	True	0.75	8.0	0.0003569728700618753	0.00011899095668729176	0	0	0.8314924710591357	vus
2	166870313	C	T	Na_trans_assoc:12	missense_variant	4|4	0.0	SCN1A	1.8845	0.8038	E1216K	1	2:166870313:C:T	True	True	0.75	8.0	0.0003569728700618753	0.00011899095668729176	0	0	0.8516850081099969	vus
2	166870330	G	T	Na_trans_assoc:12	missense_variant	5	0.0	SCN1A	1.5230000000000001	0.7977	T1210K	1	2:166870330:G:T	True	True	0.75	8.0	0.0003569728700618753	0.00011899095668729176	0	0	0.7935996159469265	vus
2	166870349	A	G	Na_trans_assoc:12	missense_variant	5|1	0.0	SCN1A	2.3344	0.8108	W1204R	1	2:166870349:A:G	True	True	0.75	8.0	0.0003569728700618753	0.00011899095668729176	0	0	0.9343360750102363	right
2	166893021	G	A	Ion_trans:498	missense_variant	4	0.0	SCN1A	2.6287	0.7418	A989V	1	2:166893021:G:A	True	True	1.0	1.0	0.00011899095668729176	0.0	0	0	0.9999982158962926	right
2	166893031	G	A	Ion_trans:498	missense_variant	5	0.0	SCN1A	2.7397	0.7527	L986F	1	2:166893031:G:A	True	True	1.0	1.0	0.00011899095668729176	0.0	0	0	0.9999992448220604	right
2	166894296	C	T	Ion_trans:499	missense_variant	5	0.0	SCN1A	3.0379	0.7473	G979E	1	2:166894296:C:T	True	True	1.0	22.0	0.0020228462636839597	0.0	0	0	0.9837292319430295	right
2	166894303	C	T	Ion_trans:499	missense_variant	5	0.0	SCN1A	2.6265	0.7418	V977M	1	2:166894303:C:T	True	True	1.0	22.0	0.0020228462636839597	0.0	0	0	0.9623691864469496	right
2	166894329	C	A	Ion_trans:499	missense_variant	5	0.0	SCN1A	3.3389	0.797	C968F	1	2:166894329:C:A	True	True	1.0	22.0	0.0020228462636839597	0.0	0	0	0.9956225415804668	right
2	166894353	A	C	Ion_trans:499	missense_variant	5	0.0	SCN1A	3.3277	0.8059999999999999	M960R	1	2:166894353:A:C	True	True	1.0	22.0	0.0020228462636839597	0.0	0	0	0.9953407096932705	right
2	166894356	C	T	Ion_trans:499	missense_variant	5	0.0	SCN1A	3.5208	0.8059999999999999	C959Y	1	2:166894356:C:T	True	True	1.0	22.0	0.0020228462636839597	0.0	0	0	0.9986583842562768	right
2	166894378	A	C	Ion_trans:499	missense_variant	5	0.0	SCN1A	3.6634	0.7993	W952G	1	2:166894378:A:C	True	True	1.0	22.0	0.0020228462636839597	0.0	0	0	0.9995842218023159	right
2	166894395	C	G	Ion_trans:499	missense_variant	5	0.0	SCN1A	3.2285	0.8246	R946P	1	2:166894395:C:G	True	True	1.0	22.0	0.0020228462636839597	0.0	0	0	0.9922859501592844	right
2	166894417	G	A	Ion_trans:499	missense_variant	5	0.0	SCN1A	2.8015	0.8	H939Y	1	2:166894417:G:A	True	True	1.0	22.0	0.0020228462636839597	0.0	0	0	0.9706880245017473	right
2	166894452	C	A	Ion_trans:499	missense_variant	5	0.0	SCN1A	3.3389	0.8246	C927F	1	2:166894452:C:A	True	True	1.0	22.0	0.0020228462636839597	0.0	0	0	0.9956225415804668	right
2	166894504	G	T	Ion_trans:499	missense_variant	5	0.0	SCN1A	2.7664	0.7815	Q910K	1	2:166894504:G:T	True	True	1.0	22.0	0.0020228462636839597	0.0	0	0	0.9688386567299904	right
2	166894542	A	G	Ion_trans:499	missense_variant	5	0.0	SCN1A	3.1628	0.7372	L897S	1	2:166894542:A:G	True	True	1.0	22.0	0.0020228462636839597	0.0	0	0	0.9897060543738198	right
2	166894608	G	A	Ion_trans:499	missense_variant	5|1	0.0	SCN1A	2.6707	0.7293	T875M	1	2:166894608:G:A	True	True	1.0	22.0	0.0020228462636839597	0.0	0	0	0.9642294035883007	right
2	166894617	G	T	Ion_trans:499	missense_variant	5	0.0	SCN1A	3.0102	0.7331	S872Y	1	2:166894617:G:T	True	True	1.0	22.0	0.0020228462636839597	0.0	0	0	0.9822566035775441	right
2	166895934	A	C	Ion_trans:500	missense_variant	5	0.0	SCN1A	3.5037	0.7252	L863W	1	2:166895934:A:C	True	True	1.0	4.0	0.00047596382674916705	0.0	0	0	0.9999999946549503	right
2	166895937	C	T	Ion_trans:500	missense_variant	5	0.0	SCN1A	2.782	0.7137	R862Q	1	2:166895937:C:T	True	True	1.0	4.0	0.00047596382674916705	0.0	0	0	0.9999926849251444	right
2	166895938	G	C	Ion_trans:500	missense_variant	5	0.0	SCN1A	3.0102	0.7137	R862G	1	2:166895938:G:C	True	True	1.0	4.0	0.00047596382674916705	0.0	0	0	0.9999987538100674	right
2	166895985	T	C	Ion_trans:500	missense_variant	5	0.0	SCN1A	2.8324	0.7398	E846G	1	2:166895985:T:C	True	True	1.0	4.0	0.00047596382674916705	0.0	0	0	0.9999948814680724	right
2	166896043	A	C	Ion_trans:500	missense_variant	5	0.0	SCN1A	3.5385	0.8015	Y827D	1	2:166896043:A:C	True	True	1.0	4.0	0.00047596382674916705	0.0	0	0	0.9999999967111735	right
2	166897803	T	C	none219746,none219747,none219748,none219749,none219750,none219751,none219752,none219753,none219754,none219755,none219756,none219757,none219758,none219759,none219760,none219761	missense_variant	5	0.0	SCN1A	1.6921	0.7912	M785V	1	2:166897803:T:C	True	True	0.9	31.0	0.0014278914802475012	0.0027367920038077107	0	1	0.9263008215535176	right
2	166897853	G	A	none219746,none219747,none219748,none219749,none219750,none219751,none219752,none219753,none219754,none219755,none219756,none219757,none219758,none219759,none219760,none219761	missense_variant	5	0.0	SCN1A	1.7298	0.7612	P768L	1	2:166897853:G:A	True	True	0.9	31.0	0.0014278914802475012	0.0027367920038077107	0	1	0.9297470864987922	right
2	166897895	C	A	none219746,none219747,none219748,none219749,none219750,none219751,none219752,none219753,none219754,none219755,none219756,none219757,none219758,none219759,none219760,none219761	missense_variant	5	0.0	SCN1A	2.2569	0.7985	W754L	1	2:166897895:C:A	True	True	0.9	31.0	0.0014278914802475012	0.0027367920038077107	0	1	0.9591227184859223	right
2	166897943	C	A	none219746,none219747,none219748,none219749,none219750,none219751,none219752,none219753,none219754,none219755,none219756,none219757,none219758,none219759,none219760,none219761	missense_variant	5	0.0	SCN1A	2.2569	0.8031	W738L	1	2:166897943:C:A	True	True	0.9	31.0	0.0014278914802475012	0.0027367920038077107	0	1	0.9591227184859223	right
2	166898843	C	T	none219746,none219747,none219748,none219749,none219750,none219751,none219752,none219753,none219754,none219755,none219756,none219757,none219758,none219759,none219760,none219761	missense_variant	4	0.0	SCN1A	1.8367	0.7766	R712Q	1	2:166898843:C:T	True	True	0.9	31.0	0.0014278914802475012	0.0027367920038077107	0	1	0.937990596397545	right
2	166900252	G	A	none219746,none219747,none219748,none219749,none219750,none219751,none219752,none219753,none219754,none219755,none219756,none219757,none219758,none219759,none219760,none219761	missense_variant	5	0.0	SCN1A	0.8193	0.7087	P657L	1	2:166900252:G:A	True	True	0.9	31.0	0.0014278914802475012	0.0027367920038077107	0	1	0.54833337588043	vus
2	166900346	T	C	none219746,none219747,none219748,none219749,none219750,none219751,none219752,none219753,none219754,none219755,none219756,none219757,none219758,none219759,none219760,none219761	missense_variant	1|5	0.0	SCN1A	0.9973	0.7481	S626G	1	2:166900346:T:C	True	True	0.9	31.0	0.0014278914802475012	0.0027367920038077107	0	1	0.709957391481957	vus
2	166900456	T	A	none219746,none219747,none219748,none219749,none219750,none219751,none219752,none219753,none219754,none219755,none219756,none219757,none219758,none219759,none219760,none219761	missense_variant	4|4	0.0	SCN1A	1.9747	0.8044	D589V	1	2:166900456:T:A	True	True	0.9	31.0	0.0014278914802475012	0.0027367920038077107	0	1	0.946254016501071	right
2	166903392	A	G	Ion_trans:502	missense_variant	5	0.0	SCN1A	1.8730000000000002	0.7652	V422A	1	2:166903392:A:G	True	True	1.0	6.0	0.0009519276534983341	0.0	0	0	0.9989653659629467	right
2	166903398	G	A	Ion_trans:502	missense_variant	5	0.0	SCN1A	1.7076	0.7614	A420V	1	2:166903398:G:A	True	True	1.0	6.0	0.0009519276534983341	0.0	0	0	0.9985466361267825	right
2	166903441	C	A	Ion_trans:502	missense_variant	5|0	0.0	SCN1A	1.9752	0.7453	V406F	1	2:166903441:C:A	True	True	1.0	6.0	0.0009519276534983341	0.0	0	0	0.9991828792436738	right
2	166903458	A	T	Ion_trans:502	missense_variant	5	0.0	SCN1A	2.1201	0.7576	M400K	1	2:166903458:A:T	True	True	1.0	6.0	0.0009519276534983341	0.0	0	0	0.999440645570396	right
2	166903462	A	C	Ion_trans:502	missense_variant	5	0.0	SCN1A	2.2569	0.7634	Y399D	1	2:166903462:A:C	True	True	1.0	6.0	0.0009519276534983341	0.0	0	0	0.9996312896141253	right
2	166904161	G	T	Ion_trans:503	missense_variant	5	0.0	SCN1A	1.6548	0.7727	D382E	1	2:166904161:G:T	True	True	0.875	8.0	0.0009519276534983342	0.00011899095668729176	0	0	0.9643107479016176	right
2	166904171	A	T	Ion_trans:503	missense_variant	5	0.0	SCN1A	2.1201	0.7887	M379K	1	2:166904171:A:T	True	True	0.875	8.0	0.0009519276534983342	0.00011899095668729176	0	0	0.9820962838142979	right
2	166904213	A	G	Ion_trans:503	missense_variant	5	0.0	SCN1A	2.2569	0.7865	F365S	1	2:166904213:A:G	True	True	0.875	8.0	0.0009519276534983342	0.00011899095668729176	0	0	0.986819929873949	right
2	166904235	G	A	Ion_trans:503	missense_variant	5	0.0	SCN1A	1.7217	0.7985	P358S	1	2:166904235:G:A	True	True	0.875	8.0	0.0009519276534983342	0.00011899095668729176	0	0	0.9669214987376593	right
2	166904259	T	C	Ion_trans:503	missense_variant	5	0.0	SCN1A	0.6859	0.7803	M350V	1	2:166904259:T:C	True	True	0.875	8.0	0.0009519276534983342	0.00011899095668729176	0	0	0.9044846137941349	right
2	166904261	T	C	Ion_trans:503	missense_variant	5	0.0	SCN1A	1.8034	0.7689	Y349C	1	2:166904261:T:C	True	True	0.875	8.0	0.0009519276534983342	0.00011899095668729176	0	0	0.9700929885936889	right
2	166904274	A	G	Ion_trans:503	missense_variant	5	0.0	SCN1A	2.2569	0.7727	C345R	1	2:166904274:A:G	True	True	0.875	8.0	0.0009519276534983342	0.00011899095668729176	0	0	0.986819929873949	right
2	166905399	G	A	Ion_trans:504	missense_variant	5	0.0	SCN1A	1.7076	0.7623	A342V	1	2:166905399:G:A	True	True	-1.0	4.0	0.0	0.0	1	0	0.00011829754210860681	wrong
2	166905400	C	A	Ion_trans:504	missense_variant	5	0.0	SCN1A	1.6384	0.7623	A342S	1	2:166905400:C:A	True	True	-1.0	4.0	0.0	0.0	1	0	0.00015141811865279764	wrong
2	166905417	C	T	Ion_trans:504	missense_variant	5	0.0	SCN1A	2.2119999999999997	0.7731	C336Y	1	2:166905417:C:T	True	True	-1.0	4.0	0.0	0.0	1	0	3.148485782910657e-05	wrong
2	166905429	T	C	Ion_trans:504	missense_variant	4	0.0	SCN1A	1.963	0.7739	D332G	1	2:166905429:T:C	True	True	-1.0	4.0	0.0	0.0	1	0	5.375887073994696e-05	wrong
2	166905439	C	A	Ion_trans:504	missense_variant	4	0.0	SCN1A	1.7667	0.7752	G329C	1	2:166905439:C:A	True	True	-1.0	4.0	0.0	0.0	1	0	9.679981915759792e-05	wrong
2	166908355	A	G	Ion_trans:505	missense_variant	5	0.0	SCN1A	2.2569	0.7909999999999999	W280R	1	2:166908355:A:G	True	True	1.0	10.0	0.0005949547834364588	0.0	0	0	0.9975427542052951	right
2	166908367	T	G	Ion_trans:505	missense_variant	5	0.0	SCN1A	1.768	0.7741	K276Q	1	2:166908367:T:G	True	True	1.0	10.0	0.0005949547834364588	0.0	0	0	0.9952551245908869	right
2	166908416	G	T	Ion_trans:505	missense_variant	5	0.0	SCN1A	1.8091	0.7436	S259R	1	2:166908416:G:T	True	True	1.0	10.0	0.0005949547834364588	0.0	0	0	0.9954346628123962	right
2	166908424	A	G	Ion_trans:505	missense_variant	5|4	0.0	SCN1A	2.2569	0.75	C257R	1	2:166908424:A:G	True	True	1.0	10.0	0.0005949547834364588	0.0	0	0	0.9975427542052951	right
2	166908446	A	C	Ion_trans:505	missense_variant	5	0.0	SCN1A	1.6548	0.7343	D249E	1	2:166908446:A:C	True	True	1.0	10.0	0.0005949547834364588	0.0	0	0	0.9947686626544066	right
2	166908454	G	C	Ion_trans:505	missense_variant	5	0.0	SCN1A	1.719	0.7306	L247V	1	2:166908454:G:C	True	True	1.0	10.0	0.0005949547834364588	0.0	0	0	0.9950435474487955	right
2	166908465	G	T	Ion_trans:505	missense_variant	5	0.0	SCN1A	1.9433	0.7175	S243Y	1	2:166908465:G:T	True	True	1.0	10.0	0.0005949547834364588	0.0	0	0	0.9960391283795158	right
2	166908474	A	G	Ion_trans:505	missense_variant	4	0.0	SCN1A	2.1659	0.7175	L240P	1	2:166908474:A:G	True	True	1.0	10.0	0.0005949547834364588	0.0	0	0	0.9971017582013391	right
2	166908478	C	T	Ion_trans:505	missense_variant	5	0.0	SCN1A	1.6869999999999998	0.7201	A239T	1	2:166908478:C:T	True	True	1.0	10.0	0.0005949547834364588	0.0	0	0	0.9949063530351919	right
2	166911182	A	G	Ion_trans:507	missense_variant	5	0.0	SCN1A	2.2569	0.779	W190R	1	2:166911182:A:G	True	True	1.0	3.0	0.0003569728700618753	0.0	0	0	0.9999325708042466	right
2	166911187	T	A	Ion_trans:507	missense_variant	5|1	0.0	SCN1A	2.0477	0.7799	D188V	1	2:166911187:T:A	True	True	1.0	3.0	0.0003569728700618753	0.0	0	0	0.9998402779032523	right
2	166911220	C	A	Ion_trans:507	missense_variant	5	0.0	SCN1A	1.9226	0.7795	G177V	1	2:166911220:C:A	True	True	1.0	3.0	0.0003569728700618753	0.0	0	0	0.9997497823348868	right
2	166912922	C	G	Ion_trans:508	missense_variant	4	0.0	SCN1A	0.8277	0.7932	E158Q	1	2:166912922:C:G	True	True	0.0	0.0	0.0	0.0	1	0	0.0959212302528935	wrong
2	166912960	A	G	none219858,none219859,none219860,none219861,none219862,none219863,none219864,none219865,none219866,none219867,none219868,none219869,none219870,none219871,none219872,none219873	missense_variant	5	0.0	SCN1A	0.7828	0.8148	M145T	1	2:166912960:A:G	True	True	1.0	18.0	0.0024988100904331264	0.0	0	1	0.9625832925620029	right
2	166912961	T	C	none219858,none219859,none219860,none219861,none219862,none219863,none219864,none219865,none219866,none219867,none219868,none219869,none219870,none219871,none219872,none219873	missense_variant	5	0.0	SCN1A	0.6888	0.8148	M145V	1	2:166912961:T:C	True	True	1.0	18.0	0.0024988100904331264	0.0	0	1	0.9570706951443175	right
2	166915083	T	A	none219858,none219859,none219860,none219861,none219862,none219863,none219864,none219865,none219866,none219867,none219868,none219869,none219870,none219871,none219872,none219873	missense_variant	5	0.0	SCN1A	0.8374	0.7807	H127L	1	2:166915083:T:A	True	True	1.0	18.0	0.0024988100904331264	0.0	0	1	0.9650960787416428	right
2	166915140	A	G	none219858,none219859,none219860,none219861,none219862,none219863,none219864,none219865,none219866,none219867,none219868,none219869,none219870,none219871,none219872,none219873	missense_variant	5	0.0	SCN1A	1.4302	0.7556	L108P	1	2:166915140:A:G	True	True	1.0	18.0	0.0024988100904331264	0.0	0	1	0.9751307134376613	right
2	166915149	G	A	none219858,none219859,none219860,none219861,none219862,none219863,none219864,none219865,none219866,none219867,none219868,none219869,none219870,none219871,none219872,none219873	missense_variant	5	0.0	SCN1A	0.7973	0.7565	T105I	1	2:166915149:G:A	True	True	1.0	18.0	0.0024988100904331264	0.0	0	1	0.9632945282424105	right
2	166915155	C	A	none219858,none219859,none219860,none219861,none219862,none219863,none219864,none219865,none219866,none219867,none219868,none219869,none219870,none219871,none219872,none219873	missense_variant	5	0.0	SCN1A	0.9595	0.7528	S103I	1	2:166915155:C:A	True	True	1.0	18.0	0.0024988100904331264	0.0	0	1	0.9693228046000608	right
2	166915191	A	G	none219858,none219859,none219860,none219861,none219862,none219863,none219864,none219865,none219866,none219867,none219868,none219869,none219870,none219871,none219872,none219873	missense_variant	5	0.0	SCN1A	0.8854	0.7695	I91T	1	2:166915191:A:G	True	True	1.0	18.0	0.0024988100904331264	0.0	0	1	0.9669644475153153	right
2	166915194	A	G	none219858,none219859,none219860,none219861,none219862,none219863,none219864,none219865,none219866,none219867,none219868,none219869,none219870,none219871,none219872,none219873	missense_variant	5	0.0	SCN1A	1.2912	0.7761	F90S	1	2:166915194:A:G	True	True	1.0	18.0	0.0024988100904331264	0.0	0	1	0.9745748166968029	right
2	166929950	A	G	none219858,none219859,none219860,none219861,none219862,none219863,none219864,none219865,none219866,none219867,none219868,none219869,none219870,none219871,none219872,none219873	missense_variant	4	0.0	SCN1A	1.8565	0.7782	L61P	1	2:166929950:A:G	True	True	1.0	18.0	0.0024988100904331264	0.0	0	1	0.9742469047134736	right
2	166930062	C	T	none219858,none219859,none219860,none219861,none219862,none219863,none219864,none219865,none219866,none219867,none219868,none219869,none219870,none219871,none219872,none219873	missense_variant	5	0.0	SCN1A	0.6557	0.7732	A24T	1	2:166930062:C:T	True	True	1.0	18.0	0.0024988100904331264	0.0	0	1	0.9546963514115797	right
8	133141789	C	T	none380602,none380603	missense_variant	4	0.0	KCNQ3	0.1249	0.7222	R660H	1	8:133141789:C:T	True	True	0.2	27.0	0.00013693002875530603	0.006435711351499384	0	1	0.007604589876851299	wrong
8	133141822	G	T	none380602,none380603	missense_variant	2	0.0063898	KCNQ3	0.4233	0.7276	P649H	0	8:133141822:G:T	True	True	0.2	27.0	0.00013693002875530603	0.006435711351499384	0	1	0.017644864748941114	right
8	133153438	T	C	none380608,none380609	missense_variant	5|0|0	0.00059904	KCNQ3	0.8225	0.7828	N348S	1	8:133153438:T:C	True	True	0.0	8.0	0.0	0.0004107900862659181	0	1	0.023533317809747326	wrong
8	133153450	A	G	none380608,none380609	missense_variant	3	0.0	KCNQ3	1.0861	0.7844	V344A	0	8:133153450:A:G	True	True	0.0	8.0	0.0	0.0004107900862659181	0	1	0.022669797590096824	right
8	133186542	G	A	Ion_trans:769,Ion_trans_2:142	missense_variant	5	0.0	KCNQ3	2.3661	0.7361	R210C	1	8:133186542:G:A	True	True	-1.0	1.0	0.0	0.0	1	0	0.0005239161842303683	wrong
8	133187704	C	A	Ion_trans_2:143,Ion_trans:770	missense_variant	5	0.0	KCNQ3	2.2772	0.7681	G190V	1	8:133187704:C:A	True	True	1.0	4.0	0.0004107900862659181	0.0	0	0	0.9998875589108808	right
8	133187708	A	G	Ion_trans_2:143,Ion_trans:770	missense_variant	5	0.0	KCNQ3	2.6377	0.7681	W189R	1	8:133187708:A:G	True	True	1.0	4.0	0.0004107900862659181	0.0	0	0	0.9999814984275822	right
8	133187719	T	C	Ion_trans_2:143,Ion_trans:770	missense_variant	5	0.0	KCNQ3	2.3221	0.7672	D185G	1	8:133187719:T:C	True	True	1.0	4.0	0.0004107900862659181	0.0	0	0	0.9999071070117306	right
8	133187738	C	T	Ion_trans_2:143,Ion_trans:770	missense_variant	5	0.0	KCNQ3	1.963	0.7795	E179K	1	8:133187738:C:T	True	True	1.0	4.0	0.0004107900862659181	0.0	0	0	0.9996510216112386	right
8	133192493	G	A	Ion_trans:771	missense_variant	4	0.0	KCNQ3	2.3564	0.708	R110C	1	8:133192493:G:A	True	True	1.0	2.0	0.00027386005751061206	0.0	0	0	0.9999783786782465	right
8	133492555	G	C	none380621	missense_variant	3	0.0	KCNQ3	0.8525	0.7132	D75E	0	8:133492555:G:C	True	True	0.0	8.0	0.0	0.00027386005751061206	0	1	0.023412589845285485	right
8	133492745	G	A	none380621	missense_variant	3	0.0	KCNQ3	1.4479	0.6940000000000001	A12V	0	8:133492745:G:A	True	True	0.0	8.0	0.0	0.00027386005751061206	0	1	0.02288645864930028	right
9	130416073	C	G	Sec1:137	missense_variant	5	0.0	STXBP1	2.5608	0.7712	T56R	1	9:130416073:C:G	True	True	-1.0	1.0	0.0	0.0	1	0	0.0004828563772366397	wrong
9	130420708	A	G	Sec1:138	missense_variant	4	0.0	STXBP1	2.2782	0.7565	Y75C	1	9:130420708:A:G	True	True	1.0	1.0	0.00013693002875530603	0.0	0	0	0.9999831770161159	right
9	130422313	T	A	Sec1:139	missense_variant	5	0.0	STXBP1	2.6265	0.7556	V84D	1	9:130422313:T:A	True	True	0.0	4.0	0.0	0.0005477201150212241	0	0	0.2499578094547342	vus
9	130423471	C	T	Sec1:140	missense_variant	4	0.0	STXBP1	2.5054	0.7612	P139L	1	9:130423471:C:T	True	True	1.0	2.0	0.00013693002875530603	0.0	0	0	0.9999908447357635	right
9	130425487	T	C	Sec1:141	missense_variant	4	0.0	STXBP1	2.347	0.7799	Y145H	1	9:130425487:T:C	True	True	1.0	2.0	0.0005477201150212241	0.0	0	0	0.999977264321711	right
9	130425593	G	A	Sec1:141	missense_variant	5	0.0	STXBP1	3.0736	0.7262	C180Y	1	9:130425593:G:A	True	True	1.0	2.0	0.0005477201150212241	0.0	0	0	0.9999999046223176	right
9	130425622	C	T	Sec1:141	missense_variant	5	0.0	STXBP1	2.5296	0.7266	R190W	1	9:130425622:C:T	True	True	1.0	2.0	0.0005477201150212241	0.0	0	0	0.9999921285233875	right
9	130425623	G	A	Sec1:141	missense_variant	5	0.0	STXBP1	2.6243	0.7266	R190Q	1	9:130425623:G:A	True	True	1.0	2.0	0.0005477201150212241	0.0	0	0	0.9999957722828943	right
9	130428515	A	G	Sec1:143	missense_variant	4	0.0	STXBP1	1.5071	0.75	H245R	1	9:130428515:A:G	True	True	1.0	2.0	0.00027386005751061206	0.0	0	0	0.99936152011033	right
9	130435491	G	A	Sec1:147	missense_variant	5	0.0	STXBP1	2.9597	0.7879	C354Y	1	9:130435491:G:A	True	True	1.0	2.0	0.00013693002875530603	0.0	0	0	0.9999997103228193	right
9	130439001	T	G	Sec1:149	missense_variant	5	0.0	STXBP1	2.1644	0.7564	M443R	1	9:130439001:T:G	True	True	0.25	5.0	0.00013693002875530603	0.0006846501437765302	0	0	0.22910771185392886	vus
9	130444744	G	A	Sec1:152	missense_variant	5	0.0	STXBP1	2.5965	0.7749	R536H	1	9:130444744:G:A	True	True	1.0	6.0	0.0006846501437765302	0.0	0	0	0.9999056472636861	right
9	130444768	G	A	Sec1:152	missense_variant	5	0.0	STXBP1	2.7695	0.7556	G544D	1	9:130444768:G:A	True	True	1.0	6.0	0.0006846501437765302	0.0	0	0	0.9999627855308478	right
9	130444788	C	T	Sec1:152	missense_variant	5	0.0	STXBP1	2.696	0.7612	R551C	1	9:130444788:C:T	True	True	1.0	6.0	0.0006846501437765302	0.0	0	0	0.9999434873625745	right
9	130446748	A	G	none393682,none393683	missense_variant	0|3	0.00039936	STXBP1	1.266	0.7852	M602V	0	9:130446748:A:G	True	True	-1.0	1.0	0.0	0.0	1	1	0.011730056485668982	right
9	131337006	G	A	Spectrin:564	missense_variant	3	0.0	SPTAN1	0.8873	0.7852	R139Q	0	9:131337006:G:A	True	True	0.0	2.0	0.0	0.00013693002875530603	0	0	0.06475090660582741	right
9	131339643	T	C	Spectrin:570	missense_variant	3	0.0	SPTAN1	1.5825	0.737	C315R	0	9:131339643:T:C	True	True	-1.0	3.0	0.0	0.0	1	0	0.0005281638201626394	right
9	131340457	A	G	Spectrin:572	missense_variant	3	0.0	SPTAN1	0.6181	0.7582	N385S	0	9:131340457:A:G	True	True	0.0	1.0	0.0	0.00027386005751061206	0	0	0.08285388520381277	right
9	131341997	T	G	Spectrin:573	missense_variant	3	0.0	SPTAN1	0.6841	0.7331	S435A	0	9:131341997:T:G	True	True	0.0	2.0	0.0	0.003149390661372039	0	0	0.06793947804457473	right
9	131343207	G	A	Spectrin:574	missense_variant	2|0	0.017572	SPTAN1	0.6286	0.7245	V444I	0	9:131343207:G:A	True	True	0.0	4.0	0.0	0.00027386005751061206	0	0	0.047830436323787605	right
9	131345010	T	C	Spectrin:578	missense_variant	3	0.0011981	SPTAN1	0.8859	0.7463	M563T	0	9:131345010:T:C	True	True	0.0	4.0	0.0	0.00013693002875530603	0	0	0.04506346194540207	right
9	131345011	G	T	Spectrin:578	missense_variant	3	0.0	SPTAN1	0.8633	0.7463	M563I	0	9:131345011:G:T	True	True	0.0	4.0	0.0	0.00013693002875530603	0	0	0.04530528456982843	right
9	131348126	A	G	Spectrin:586	missense_variant	3	0.0	SPTAN1	1.9545	0.7659999999999999	E887G	0	9:131348126:A:G	True	True	0.0	2.0	0.0	0.00013693002875530603	0	0	0.07700813953575221	right
9	131348219	A	G	Spectrin:587	missense_variant	3	0.00039936	SPTAN1	2.0632	0.7849	Y918C	0	9:131348219:A:G	True	True	0.0	1.0	0.0	0.00027386005751061206	0	0	0.10469027194246117	vus
9	131349963	G	T	Spectrin:588	missense_variant	3	0.0	SPTAN1	1.7661	0.764	A953S	0	9:131349963:G:T	True	True	0.0	2.0	0.0	0.00027386005751061206	0	0	0.06609904458062636	right
9	131349967	A	C	Spectrin:588	missense_variant	3	0.0	SPTAN1	1.7667	0.7632	Q954P	0	9:131349967:A:C	True	True	0.0	2.0	0.0	0.00027386005751061206	0	0	0.06612253439727196	right
9	131351104	C	T	none394357,none394358,none394359,none394360	missense_variant	3	0.0	SPTAN1	0.8201	0.7490000000000001	T963M	0	9:131351104:C:T	True	True	0.0	1.0	0.0	0.00013693002875530603	0	1	0.07936933137023282	right
9	131353867	G	A	none394365,none394366,none394367,none394368	missense_variant	3	0.0	SPTAN1	0.8122	0.7537	G1040S	0	9:131353867:G:A	True	True	-1.0	3.0	0.0	0.0	1	1	0.013628659654765831	right
9	131356575	G	A	Spectrin:589	missense_variant	3	0.0	SPTAN1	0.7556	0.7795	A1113T	0	9:131356575:G:A	True	True	0.0	2.0	0.0	0.00027386005751061206	0	0	0.06679375325033597	right
9	131367396	T	C	Spectrin:592	missense_variant	3	0.0	SPTAN1	2.0028	0.7778	V1268A	0	9:131367396:T:C	True	True	0.0	2.0	0.0	0.00027386005751061206	0	0	0.08126903627775148	right
9	131367677	A	G	Spectrin:593	missense_variant	3	0.0	SPTAN1	0.7403	0.7871	S1323G	0	9:131367677:A:G	True	True	0.0	1.0	0.0	0.00013693002875530603	0	0	0.08078670325715438	right
9	131367756	G	A	Spectrin:594	missense_variant	3	0.0	SPTAN1	1.9908	0.763	R1349Q	0	9:131367756:G:A	True	True	0.0	2.0	0.0	0.0005477201150212241	0	0	0.08013549682342605	right
9	131374440	C	A	Spectrin:604	missense_variant	3	0.0	SPTAN1	0.96	0.7992	A1653E	0	9:131374440:C:A	True	True	0.0	1.0	0.0	0.0004107900862659181	0	0	0.07690886293405802	right
9	131378112	T	C	Spectrin:608	missense_variant	3	0.0	SPTAN1	2.4136	0.7849	W1784R	0	9:131378112:T:C	True	True	0.0	1.0	0.0	0.00013693002875530603	0	0	0.2002699565296531	vus
9	131380339	C	T	Spectrin:610	missense_variant	2|0	0.0	SPTAN1	0.8574	0.7744	A1851V	0	9:131380339:C:T	True	True	0.0	4.0	0.0	0.00013693002875530603	0	0	0.04536878954985933	right
9	131381197	A	G	Spectrin:612	missense_variant	3	0.00059904	SPTAN1	0.6158	0.7863	N1883S	0	9:131381197:A:G	True	True	0.0	2.0	0.0	0.00027386005751061206	0	0	0.06888367821273511	right
9	131381213	A	C	Spectrin:612	missense_variant	4	0.0	SPTAN1	1.7574	0.8084	E1888D	1	9:131381213:A:C	True	True	0.0	2.0	0.0	0.00027386005751061206	0	0	0.06576501268920802	wrong
9	131386696	G	C	Spectrin:614	missense_variant	3	0.0	SPTAN1	1.9067	0.7727	K1974N	0	9:131386696:G:C	True	True	0.0	1.0	0.0	0.00013693002875530603	0	0	0.0881828817348602	right
9	131387444	C	A	Spectrin:616	missense_variant	3	0.0	SPTAN1	1.905	0.75	L2019I	0	9:131387444:C:A	True	True	0.0	2.0	0.0	0.00013693002875530603	0	0	0.07335249144194762	right
9	131388081	C	G	Spectrin:617	missense_variant	4	0.0	SPTAN1	1.426	0.763	Q2035E	1	9:131388081:C:G	True	True	0.0	4.0	0.0	0.00027386005751061206	0	0	0.04192114587297264	wrong
9	131388126	G	A	Spectrin:617	missense_variant	3	0.0	SPTAN1	0.7728	0.7528	A2050T	0	9:131388126:G:A	True	True	0.0	4.0	0.0	0.00027386005751061206	0	0	0.046294003217049885	right
9	131388168	G	A	Spectrin:617	missense_variant	3	0.00019968	SPTAN1	0.8548	0.7509	A2064T	0	9:131388168:G:A	True	True	0.0	4.0	0.0	0.00027386005751061206	0	0	0.04540190125864725	right
9	131388806	A	C	Spectrin:618	missense_variant	3	0.0	SPTAN1	0.9548	0.7778	D2139A	0	9:131388806:A:C	True	True	0.0	6.0	0.0	0.00013693002875530603	0	0	0.031573924174429883	right
9	131394581	T	C	Spectrin:625	missense_variant	4	0.0	SPTAN1	1.2321	0.794	L2313P	1	9:131394581:T:C	True	True	1.0	3.0	0.00027386005751061206	0.0	0	0	0.9982217712826991	right
9	135771984	G	C	none396086,none396087,none396088	missense_variant	3	0.0	TSC1	0.5239	0.7757	L1045V	0	9:135771984:G:C	True	True	0.0	15.0	0.0	0.0012554052169061235	0	1	0.00854911747326302	right
9	135772031	C	T	none396086,none396087,none396088	missense_variant	3	0.0	TSC1	0.4638	0.7802	S1029N	0	9:135772031:C:T	True	True	0.0	15.0	0.0	0.0012554052169061235	0	1	0.00841296968351104	right
9	135772085	G	T	Hamartin:0	missense_variant	3	0.0	TSC1	0.6725	0.7823	A1011E	0	9:135772085:G:T	True	True	0.0	1.0	0.0	0.00013948946854512484	0	0	0.08195580405434034	right
9	135779813	A	T	Hamartin:2	missense_variant	3	0.0	TSC1	1.8992	0.7594	W676R	0	9:135779813:A:T	True	True	-1.0	1.0	0.0	0.0	1	0	0.0013061299698183906	right
9	135782214	G	A	Hamartin:4	missense_variant	1|1|2|2|2	0.0041933	TSC1	0.5195	0.7537	P448S	0	9:135782214:G:A	True	True	0.0	2.0	0.0	0.00013948946854512484	0	0	0.07018437517496247	right
9	135786013	G	A	Hamartin:6,Hamartin:7,Hamartin:8	missense_variant	1|3|3	0.00019968	TSC1	0.4659	0.7085	S402L	0	9:135786013:G:A	True	True	0.0	3.0	0.0	0.0008369368112707491	0	0	0.059106950900963975	right
9	135786433	G	A	Hamartin:9	missense_variant	3	0.0	TSC1	0.5235	0.7353	P366L	0	9:135786433:G:A	True	True	0.0	5.0	0.0	0.0009764262798158739	0	0	0.04099387694936773	right
9	135786868	G	A	Hamartin:10,Hamartin:11	missense_variant	0|1|3	0.00019968	TSC1	0.4444	0.7257	S334L	0	9:135786868:G:A	True	True	0.0	4.0	0.0	0.0002789789370902497	0	0	0.04954487547191978	right
9	135796816	A	C	Hamartin:14	missense_variant	5|1	0.0	TSC1	1.7363	0.7895	M224R	1	9:135796816:A:C	True	True	1.0	4.0	0.0009764262798158739	0.0	0	0	0.9993328467762584	right
9	135797301	G	A	Hamartin:15	missense_variant	1|3|0	0.0	TSC1	1.4874	0.7649	R190C	0	9:135797301:G:A	True	True	0.0	4.0	0.0	0.00013948946854512484	0	0	0.04219971608036765	right
9	135797330	A	G	Hamartin:15	missense_variant	5|1	0.0	TSC1	1.5726	0.7632	L180P	1	9:135797330:A:G	True	True	0.0	4.0	0.0	0.00013948946854512484	0	0	0.04295872029494425	wrong
9	135797337	C	T	Hamartin:15	missense_variant	1|1|3	0.0	TSC1	0.8113	0.7538	V178I	0	9:135797337:C:T	True	True	0.0	4.0	0.0	0.00013948946854512484	0	0	0.045868684045233414	right
9	135801123	G	C	Hamartin:19	missense_variant	4	0.0	TSC1	1.4226	0.759	L72V	1	9:135801123:G:C	True	True	0.0	5.0	0.0	0.0002789789370902497	0	0	0.03551070704716734	wrong
12	52056803	A	G	none89024,none89025,none89026	missense_variant	3	0.0	SCN8A	1.868	0.7528	I68V	0	12:52056803:A:G	True	True	-1.0	3.0	0.0	0.0	1	1	0.00020345082949047927	right
12	52081003	C	A	Ion_trans:185	missense_variant	4	0.0	SCN8A	2.2357	0.7684	A205E	1	12:52081003:C:A	True	True	1.0	2.0	0.00019227071716977504	0.0	0	0	0.9999598218791206	right
12	52082594	A	G	Ion_trans:186	missense_variant	5	0.0	SCN8A	2.3288	0.7132	R223G	1	12:52082594:A:G	True	True	-1.0	1.0	0.0	0.0	1	0	0.0005446841541843666	wrong
12	52096663	A	G	Ion_trans:190	missense_variant	4	0.0	SCN8A	1.9939	0.8	M367V	1	12:52096663:A:G	True	True	1.0	1.0	0.00019227071716977504	0.0	0	0	0.9999307581795058	right
12	52159459	G	A	Ion_trans:194,Ion_trans:195	missense_variant	4|5	0.0	SCN8A	3.3747	0.7154	R850Q	1	12:52159459:G:A	True	True	1.0	1.0	0.00019227071716977504	0.0	0	0	0.9999999991907593	right
12	52159552	T	C	Ion_trans:194,Ion_trans:195	missense_variant	4	0.0	SCN8A	3.5037	0.7190000000000001	V881A	1	12:52159552:T:C	True	True	1.0	1.0	0.00019227071716977504	0.0	0	0	0.9999999998777609	right
12	52159585	T	G	Ion_trans:194,Ion_trans:195	missense_variant	5	0.0	SCN8A	3.7146	0.7621	V892G	1	12:52159585:T:G	True	True	1.0	1.0	0.00019227071716977504	0.0	0	0	0.9999999999964702	right
12	52180338	G	T	Ion_trans:200,Ion_trans:201	missense_variant	5	0.0	SCN8A	2.1667	0.7333	A1278S	1	12:52180338:G:T	True	True	1.0	4.0	0.00019227071716977504	0.0	0	0	0.999825915553871	right
12	52180374	C	G	Ion_trans:200,Ion_trans:201	missense_variant	5	0.0	SCN8A	1.9248	0.7482	L1290V	1	12:52180374:C:G	True	True	1.0	4.0	0.00019227071716977504	0.0	0	0	0.999607164055167	right
12	52183134	G	A	Ion_trans:203	missense_variant	5	0.0	SCN8A	2.255	0.7949	G1410S	1	12:52183134:G:A	True	True	-1.0	1.0	0.0	0.0	1	0	0.0006000025558668603	wrong
12	52184185	G	A	none89084,none89085,none89086	missense_variant	4	0.0	SCN8A	1.5409	0.8327	G1434R	1	12:52184185:G:A	True	True	1.0	7.0	0.0005768121515093252	0.0	0	1	0.9973786834734315	right
12	52184204	T	A	none89084,none89085,none89086	missense_variant	4	0.0	SCN8A	1.9046	0.8352	M1440K	1	12:52184204:T:A	True	True	1.0	7.0	0.0005768121515093252	0.0	0	1	0.9985681024962119	right
12	52188404	G	C	Ion_trans:204	missense_variant	4	0.0	SCN8A	1.3789	0.7818	V1551L	1	12:52188404:G:C	True	True	-1.0	3.0	0.0	0.0	1	0	0.001164495085117338	wrong
12	52200159	T	C	Ion_trans:205	missense_variant	5	0.0	SCN8A	2.7757	0.7085	L1589P	1	12:52200159:T:C	True	True	1.0	7.0	0.0009613535858488751	0.0	0	0	0.9999268959687164	right
12	52200572	A	G	none89090,none89091,none89092	missense_variant	5	0.0	SCN8A	1.6978	0.7766	N1727D	1	12:52200572:A:G	True	True	1.0	9.0	0.0019227071716977505	0.0	0	1	0.9962890527575039	right
12	52200884	C	T	none89090,none89091,none89092	missense_variant	4	0.0	SCN8A	2.2975	0.7612	R1831W	1	12:52200884:C:T	True	True	1.0	9.0	0.0019227071716977505	0.0	0	1	0.9985935370564495	right
19	35523464	G	A	V-set:346	missense_variant	5	0.0	SCN1B	1.6218	0.7378	D25N	1	19:35523464:G:A	True	True	1.0	4.0	0.00011899095668729176	0.0	0	0	0.9991034935551997	right
19	35523473	A	G	V-set:346	missense_variant	4	0.0	SCN1B	1.6822	0.7481	T28A	1	19:35523473:A:G	True	True	1.0	4.0	0.00011899095668729176	0.0	0	0	0.9992297858456302	right
19	35524449	G	A	ig:599,V-set:347	missense_variant	5	0.0	SCN1B	1.7589	0.7707	R85H	1	19:35524449:G:A	True	True	1.0	6.0	0.0007139457401237506	0.0	0	0	0.9986832778584872	right
19	35524454	G	C	ig:599,V-set:347	missense_variant	5	0.0	SCN1B	0.7758	0.7736	E87Q	1	19:35524454:G:C	True	True	1.0	6.0	0.0007139457401237506	0.0	0	0	0.9926788021371329	right
19	35524824	T	C	none184499,none184500,none184501	missense_variant	2	0.3776	SCN1B	1.0689	0.7528	L210P	0	19:35524824:T:C	True	True	0.0	12.0	0.0	0.007377439314612089	0	1	0.01341882024423509	right
19	35524938	G	T	none184499,none184500,none184501	missense_variant	3	0.0	SCN1B	1.4226	0.7306	S248I	0	19:35524938:G:T	True	True	0.0	12.0	0.0	0.007377439314612089	0	1	0.013873685931579364	right
19	35524939	C	A	none184499,none184500,none184501	missense_variant	2	0.1274	SCN1B	1.2633	0.7306	S248R	0	19:35524939:C:A	True	True	0.0	12.0	0.0	0.007377439314612089	0	1	0.013487475348225995	right
19	35524944	G	C	none184499,none184500,none184501	missense_variant	2|2	0.1192	SCN1B	1.4078	0.7132	R250T	0	19:35524944:G:C	True	True	0.0	12.0	0.0	0.007377439314612089	0	1	0.013820327098715397	right
19	35524944	G	A	none184499,none184500,none184501	missense_variant	2	0.0	SCN1B	0.809	0.7132	R250K	0	19:35524944:G:A	True	True	0.0	12.0	0.0	0.007377439314612089	0	1	0.013640675076306948	right
19	35524946	G	A	none184499,none184500,none184501	missense_variant	4	0.0	SCN1B	0.7128	0.7169	V251I	1	19:35524946:G:A	True	True	0.0	12.0	0.0	0.007377439314612089	0	1	0.01373863986467217	wrong
20	62038052	G	A	none243251,none243252,none243253,none243254	missense_variant	2	0.0	KCNQ2	1.5418	0.7289	S827L	0	20:62038052:G:A	True	True	0.14285714285714285	31.0	0.00013693002875530603	0.0031493906613720385	0	1	0.14968184770328835	vus
20	62038277	T	G	none243251,none243252,none243253,none243254	missense_variant	2|2	0.5905	KCNQ2	0.6352	0.7455	N752T	0	20:62038277:T:G	True	True	0.14285714285714285	31.0	0.00013693002875530603	0.0031493906613720385	0	1	0.017036304007107553	right
20	62038352	T	C	none243251,none243252,none243253,none243254	missense_variant	3|0	0.0015974000000000001	KCNQ2	0.7891	0.7316	Y727C	0	20:62038352:T:C	True	True	0.14285714285714285	31.0	0.00013693002875530603	0.0031493906613720385	0	1	0.02611134664100282	right
20	62038469	G	A	none243251,none243252,none243253,none243254	missense_variant	5	0.0	KCNQ2	1.6057	0.7343	T688I	1	20:62038469:G:A	True	True	0.14285714285714285	31.0	0.00013693002875530603	0.0031493906613720385	0	1	0.17162854916731804	vus
20	62038706	A	C	none243251,none243252,none243253,none243254	missense_variant	5	0.0	KCNQ2	1.9762	0.7724	L609R	1	20:62038706:A:C	True	True	0.14285714285714285	31.0	0.00013693002875530603	0.0031493906613720385	0	1	0.37595222267060097	vus
20	62039889	T	A	KCNQ_channel:10	missense_variant	5	0.0	KCNQ2	0.7566	0.7397	R560S	1	20:62039889:T:A	True	True	0.0	0.0	0.0	0.0	1	0	0.097325910799827	wrong
20	62044900	T	C	KCNQ_channel:11	missense_variant	4	0.0	KCNQ2	1.9131	0.7678	K528E	1	20:62044900:T:C	True	True	1.0	18.0	0.0035601807476379563	0.0	0	0	0.9761385547044604	right
20	62044904	C	A	KCNQ_channel:11	missense_variant	5|5	0.0	KCNQ2	1.729	0.7667	K526N	1	20:62044904:C:A	True	True	1.0	18.0	0.0035601807476379563	0.0	0	0	0.9765321791796917	right
20	62044927	G	A	KCNQ_channel:11	missense_variant	4	0.0	KCNQ2	1.6082	0.7333	R519W	1	20:62044927:G:A	True	True	1.0	18.0	0.0035601807476379563	0.0	0	0	0.9767616058759698	right
20	62044930	T	C	KCNQ_channel:11	missense_variant	5	0.0	KCNQ2	1.5591	0.7353	M518V	1	20:62044930:T:C	True	True	1.0	18.0	0.0035601807476379563	0.0	0	0	0.976805508263529	right
20	62050985	G	A	none243263,none243264,none243265,none243266	missense_variant	5	0.0	KCNQ2	0.6304	0.7603	P430S	1	20:62050985:G:A	True	True	0.8	29.0	0.0021908804600848965	0.0023278104888402023	0	1	0.35180359397579253	vus
20	62065204	G	T	none243263,none243264,none243265,none243266,none243267	missense_variant	5	0.0	KCNQ2	3.0211	0.7583	T359K	1	20:62065204:G:T	True	True	0.8	29.0	0.0021908804600848965	0.0023278104888402023	0	1	0.9957916097470694	right
20	62065231	T	C	none243263,none243264,none243265,none243266,none243267	missense_variant	4	0.0	KCNQ2	1.3019	0.7405	N350S	1	20:62065231:T:C	True	True	0.8	29.0	0.0021908804600848965	0.0023278104888402023	0	1	0.8426966275958412	vus
20	62069985	A	C	none243263,none243264,none243265,none243266,none243267	missense_variant	5	0.0	KCNQ2	3.2853	0.7603	L339R	1	20:62069985:A:C	True	True	0.8	29.0	0.0021908804600848965	0.0023278104888402023	0	1	0.999036899595647	right
20	62070003	C	T	none243263,none243264,none243265,none243266,none243267	missense_variant	5	0.0	KCNQ2	2.6049	0.7765	R333Q	1	20:62070003:C:T	True	True	0.8	29.0	0.0021908804600848965	0.0023278104888402023	0	1	0.9821693550026012	right
20	62070058	C	G	Ion_trans_2:103	missense_variant	5	0.0	KCNQ2	3.0926	0.7601	G315R	1	20:62070058:C:G	True	True	1.0	2.0	0.00013693002875530603	0.0	0	0	0.9999999215828449	right
20	62070961	G	A	Ion_trans:551,Ion_trans_2:104	missense_variant	5	0.0	KCNQ2	2.7544	0.7138	A306V	1	20:62070961:G:A	True	True	1.0	9.0	0.0020539504313295907	0.0	0	0	0.9997073372802621	right
20	62071009	C	T	Ion_trans:551,Ion_trans_2:104	missense_variant	5	0.0	KCNQ2	3.2753	0.7417	G290D	1	20:62071009:C:T	True	True	1.0	9.0	0.0020539504313295907	0.0	0	0	0.9999905346998386	right
20	62071027	T	C	Ion_trans:551,Ion_trans_2:104	missense_variant	5	0.0	KCNQ2	1.9456	0.7416	Y284C	1	20:62071027:T:C	True	True	1.0	9.0	0.0020539504313295907	0.0	0	0	0.9972832221181607	right
20	62071028	A	C	Ion_trans:551,Ion_trans_2:104	missense_variant	5	0.0	KCNQ2	3.7146	0.7416	Y284D	1	20:62071028:A:C	True	True	1.0	9.0	0.0020539504313295907	0.0	0	0	0.9999999336597964	right
20	62071060	A	T	Ion_trans:551,Ion_trans_2:104	missense_variant	4	0.0	KCNQ2	4.2198	0.7736	I273N	1	20:62071060:A:T	True	True	1.0	9.0	0.0020539504313295907	0.0	0	0	0.9999999999919129	right
20	62073763	C	A	Ion_trans_2:105,Ion_trans:552	missense_variant	5	0.0	KCNQ2	3.1125	0.7707	G271V	1	20:62073763:C:A	True	True	1.0	8.0	0.0017800903738189784	0.0	0	0	0.9999835050460545	right
20	62073772	A	G	Ion_trans_2:105,Ion_trans:552	missense_variant	5	0.0	KCNQ2	2.3243	0.7715	L268P	1	20:62073772:A:G	True	True	1.0	8.0	0.0017800903738189784	0.0	0	0	0.999179196465153	right
20	62073802	T	C	Ion_trans_2:105,Ion_trans:552	missense_variant	5	0.0	KCNQ2	1.3032	0.7632	N258S	1	20:62073802:T:C	True	True	1.0	8.0	0.0017800903738189784	0.0	0	0	0.9955144866470539	right
20	62073826	A	C	Ion_trans_2:105,Ion_trans:552	missense_variant	5	0.0	KCNQ2	2.481	0.7698	V250G	1	20:62073826:A:C	True	True	1.0	8.0	0.0017800903738189784	0.0	0	0	0.999499718454472	right
20	62073835	G	C	Ion_trans_2:105,Ion_trans:552	missense_variant	5|5	0.0	KCNQ2	3.3277	0.7603	S247W	1	20:62073835:G:C	True	True	1.0	8.0	0.0017800903738189784	0.0	0	0	0.9999974843390725	right
20	62073848	G	A	Ion_trans_2:105,Ion_trans:552	missense_variant	5	0.0	KCNQ2	2.7574	0.7585	L243F	1	20:62073848:G:A	True	True	1.0	8.0	0.0017800903738189784	0.0	0	0	0.9998447892000125	right
20	62073865	T	C	Ion_trans_2:105,Ion_trans:552	missense_variant	5	0.0	KCNQ2	3.0614	0.7368	Y237C	1	20:62073865:T:C	True	True	1.0	8.0	0.0017800903738189784	0.0	0	0	0.9999757902169593	right
20	62073874	G	A	Ion_trans:552	missense_variant	0|4	0.0	KCNQ2	2.6934	0.7276	T234I	1	20:62073874:G:A	True	True	1.0	9.0	0.0017800903738189784	0.0	0	0	0.9996129853620811	right
20	62073882	C	A	Ion_trans:552	missense_variant	4	0.0	KCNQ2	2.1277	0.7341	E231D	1	20:62073882:C:A	True	True	1.0	9.0	0.0017800903738189784	0.0	0	0	0.9979750055068509	right
20	62073882	C	G	Ion_trans:552	missense_variant	5	0.0	KCNQ2	2.1277	0.7341	E231D	1	20:62073882:C:G	True	True	1.0	9.0	0.0017800903738189784	0.0	0	0	0.9979750055068509	right
20	62073883	T	C	Ion_trans:552	missense_variant	4	0.0	KCNQ2	2.4474	0.7341	E231G	1	20:62073883:T:C	True	True	1.0	9.0	0.0017800903738189784	0.0	0	0	0.9990585722437297	right
20	62076018	G	T	Ion_trans:553	missense_variant	5	0.0	KCNQ2	2.7788	0.7256	H228Q	1	20:62076018:G:T	True	True	0.9333333333333333	16.0	0.003697110776393262	0.00013693002875530603	0	0	0.9857594114569809	right
20	62076031	A	G	Ion_trans:553	missense_variant	4	0.0	KCNQ2	2.7788	0.7341	V224A	1	20:62076031:A:G	True	True	0.9333333333333333	16.0	0.003697110776393262	0.00013693002875530603	0	0	0.9857594114569809	right
20	62076062	G	A	Ion_trans:553	missense_variant	5|4	0.0	KCNQ2	2.8324	0.7279	R214W	1	20:62076062:G:A	True	True	0.9333333333333333	16.0	0.003697110776393262	0.00013693002875530603	0	0	0.9880294872166961	right
20	62076067	T	C	Ion_trans:553	missense_variant	5	0.0	KCNQ2	3.2285	0.7096	D212G	1	20:62076067:T:C	True	True	0.9333333333333333	16.0	0.003697110776393262	0.00013693002875530603	0	0	0.9982264863324585	right
20	62076080	T	C	Ion_trans:553	missense_variant	5	0.0	KCNQ2	2.3017	0.7044	M208V	1	20:62076080:T:C	True	True	0.9333333333333333	16.0	0.003697110776393262	0.00013693002875530603	0	0	0.9641689440720765	right
20	62076090	C	G	Ion_trans:553	missense_variant	5	0.0	KCNQ2	2.6707	0.7263	Q204H	1	20:62076090:C:G	True	True	0.9333333333333333	16.0	0.003697110776393262	0.00013693002875530603	0	0	0.9807742304340826	right
20	62076115	G	A	Ion_trans:553	missense_variant	5	0.0	KCNQ2	2.6908	0.7148	A196V	1	20:62076115:G:A	True	True	0.9333333333333333	16.0	0.003697110776393262	0.00013693002875530603	0	0	0.981730685210362	right
20	62076674	C	T	Ion_trans:554	missense_variant	4	0.0	KCNQ2	3.0437	0.7444	R144Q	1	20:62076674:C:T	True	True	1.0	2.0	0.00013693002875530603	0.0	0	0	0.9999998708591533	right
20	62076717	C	T	Ion_trans:554	missense_variant	5	0.0	KCNQ2	3.0102	0.7585	E130K	1	20:62076717:C:T	True	True	1.0	2.0	0.00013693002875530603	0.0	0	0	0.9999998204664404	right
20	62078131	T	C	none243293,none243294,none243295,none243296,none243297	missense_variant	5	0.0	KCNQ2	1.8845	0.7491	E119G	1	20:62078131:T:C	True	True	0.6666666666666666	10.0	0.0006846501437765302	0.0004107900862659181	0	1	0.6397281320467759	vus
20	62078168	G	A	none243293,none243294,none243295,none243296,none243297	missense_variant	5	0.0	KCNQ2	2.5313	0.7566	L107F	1	20:62078168:G:A	True	True	0.6666666666666666	10.0	0.0006846501437765302	0.0004107900862659181	0	1	0.8760474016895646	vus
X	18525274	G	C	Pkinase:3570,Pkinase_Tyr:2430	missense_variant	4	0.0	CDKL5	2.8081	0.7715	G20R	1	X:18525274:G:C	True	True	0.0	0.0	0.0	0.0	1	0	0.6069778157625163	vus
X	18525275	G	A	Pkinase:3570,Pkinase_Tyr:2430	missense_variant	4	0.0	CDKL5	2.9842	0.7715	G20D	1	X:18525275:G:A	True	True	0.0	0.0	0.0	0.0	1	0	0.8191522947557605	vus
X	18528948	G	A	Pkinase:3571,Pkinase_Tyr:2431	missense_variant	5	0.0	CDKL5	2.8081	0.7707	G25R	1	X:18528948:G:A	True	True	1.0	1.0	0.0001165093790050099	0.0	0	0	0.9999995737258197	right
X	18528966	A	G	Pkinase:3571,Pkinase_Tyr:2431	missense_variant	5	0.0	CDKL5	2.3697	0.7659999999999999	R31G	1	X:18528966:A:G	True	True	1.0	1.0	0.0001165093790050099	0.0	0	0	0.9999900478915722	right
X	18582616	C	T	Pkinase:3572,Pkinase_Tyr:2432	missense_variant	5|5	0.0	CDKL5	2.3784	0.8099	A40V	1	X:18582616:C:T	True	True	1.0	1.0	0.0001165093790050099	0.0	0	0	0.9999905517623106	right
X	18582618	A	T	Pkinase:3572,Pkinase_Tyr:2432	missense_variant	4	0.0	CDKL5	3.0437	0.8106	I41F	1	X:18582618:A:T	True	True	1.0	1.0	0.0001165093790050099	0.0	0	0	0.9999999549416807	right
X	18582622	A	G	Pkinase:3572,Pkinase_Tyr:2432	missense_variant	5|5	0.0	CDKL5	2.2607	0.8106	K42R	1	X:18582622:A:G	True	True	1.0	1.0	0.0001165093790050099	0.0	0	0	0.9999814794557862	right
X	18593519	T	C	Pkinase:3573,Pkinase_Tyr:2433	missense_variant	4	0.0	CDKL5	3.3624	0.7824	L64P	1	X:18593519:T:C	True	True	1.0	3.0	0.00034952813701502974	0.0	0	0	0.9999999892992341	right
X	18593522	G	A	Pkinase:3573,Pkinase_Tyr:2433	missense_variant	2	0.0	CDKL5	2.386	0.7757	R65Q	0	X:18593522:G:A	True	True	1.0	3.0	0.00034952813701502974	0.0	0	0	0.9999636487476249	wrong
X	18593527	C	T	Pkinase:3573,Pkinase_Tyr:2433	missense_variant	0|5	0.0	CDKL5	2.6243	0.7614	L67F	1	X:18593527:C:T	True	True	1.0	3.0	0.00034952813701502974	0.0	0	0	0.9999906318017268	right
X	18593539	A	G	Pkinase:3573,Pkinase_Tyr:2433	missense_variant	5|4	0.0	CDKL5	2.6155	0.7557	N71D	1	X:18593539:A:G	True	True	1.0	3.0	0.00034952813701502974	0.0	0	0	0.9999900950814307	right
X	18593543	T	A	Pkinase:3573,Pkinase_Tyr:2433	missense_variant	5	0.0	CDKL5	3.5037	0.7586	I72N	1	X:18593543:T:A	True	True	1.0	3.0	0.00034952813701502974	0.0	0	0	0.9999999983986294	right
X	18598038	A	G	Pkinase:3574,Pkinase_Tyr:2434	missense_variant	5	0.0	CDKL5	2.3822	0.8038	Q118R	1	X:18598038:A:G	True	True	1.0	8.0	0.0009320750320400791	0.0	0	0	0.999296952136857	right
X	18600062	G	T	Pkinase:3575,Pkinase_Tyr:2435	missense_variant	5|5	0.0	CDKL5	3.2285	0.7778	C152F	1	X:18600062:G:T	True	True	1.0	4.0	0.0004660375160200396	0.0	0	0	0.9999998481464014	right
X	18600065	A	G	Pkinase:3575,Pkinase_Tyr:2435	missense_variant	5	0.0	CDKL5	2.9144	0.777	D153G	1	X:18600065:A:G	True	True	1.0	4.0	0.0004660375160200396	0.0	0	0	0.9999972484653962	right
X	18602392	G	C	Pkinase_Tyr:2436,Pkinase:3576	missense_variant	4	0.0	CDKL5	3.1334	0.7732	R158P	1	X:18602392:G:C	True	True	0.5	2.0	0.0001165093790050099	0.0001165093790050099	0	0	0.9984570524140611	right
X	18602433	G	A	Pkinase_Tyr:2436,Pkinase:3576	missense_variant	5	0.0	CDKL5	2.1058	0.7338	V172I	1	X:18602433:G:A	True	True	0.5	2.0	0.0001165093790050099	0.0001165093790050099	0	0	0.7196285618145969	vus
X	18602444	A	T	Pkinase:3576	missense_variant	5|5	0.0	CDKL5	2.5843	0.7375	R175S	1	X:18602444:A:T	True	True	0.8333333333333334	6.0	0.0009320750320400791	0.0001165093790050099	0	0	0.9961036889519278	right
X	18602445	T	A	Pkinase:3576	missense_variant	4	0.0	CDKL5	3.5208	0.7413	W176R	1	X:18602445:T:A	True	True	0.8333333333333334	6.0	0.0009320750320400791	0.0001165093790050099	0	0	0.99999812417504	right
X	18602445	T	G	Pkinase:3576	missense_variant	5	0.0	CDKL5	3.3747	0.7413	W176G	1	X:18602445:T:G	True	True	0.8333333333333334	6.0	0.0009320750320400791	0.0001165093790050099	0	0	0.9999892681795934	right
X	18602447	G	T	Pkinase:3576	missense_variant	5	0.0	CDKL5	3.3277	0.7413	W176C	1	X:18602447:G:T	True	True	0.8333333333333334	6.0	0.0009320750320400791	0.0001165093790050099	0	0	0.9999821414709144	right
X	18602452	G	C	Pkinase:3576	missense_variant	5	0.0	CDKL5	3.1334	0.7443	R178P	1	X:18602452:G:C	True	True	0.8333333333333334	6.0	0.0009320750320400791	0.0001165093790050099	0	0	0.999885122645743	right
X	18602458	C	T	Pkinase:3576	missense_variant	5	0.0	CDKL5	2.6112	0.7577	P180L	1	X:18602458:C:T	True	True	0.8333333333333334	6.0	0.0009320750320400791	0.0001165093790050099	0	0	0.996558350311633	right
X	18606096	G	A	Pkinase:3577	missense_variant	5	0.0	CDKL5	2.5477	0.7434	D193N	1	X:18606096:G:A	True	True	1.0	5.0	0.0005825468950250495	0.0	0	0	0.9999383525499065	right
X	18606097	A	G	Pkinase:3577	missense_variant	5	0.0	CDKL5	2.9144	0.7434	D193G	1	X:18606097:A:G	True	True	1.0	5.0	0.0005825468950250495	0.0	0	0	0.9999935149441993	right
X	18606175	A	C	Pkinase:3577	missense_variant	4	0.0	CDKL5	2.5477	0.7632	Q219P	1	X:18606175:A:C	True	True	1.0	5.0	0.0005825468950250495	0.0	0	0	0.9999383525499065	right
X	18606178	T	C	Pkinase:3577	missense_variant	5	0.0	CDKL5	3.3624	0.7744	L220P	1	X:18606178:T:C	True	True	1.0	5.0	0.0005825468950250495	0.0	0	0	0.9999999026971046	right
X	18606199	T	G	Pkinase:3577	missense_variant	4	0.0	CDKL5	3.1863	0.779	L227R	1	X:18606199:T:G	True	True	1.0	5.0	0.0005825468950250495	0.0	0	0	0.9999993647142852	right
X	18616611	A	C	Pkinase:3579	missense_variant	1|4	0.0	CDKL5	1.0481	0.7803	R285S	1	X:18616611:A:C	True	True	1.0	2.0	0.0002330187580100198	0.0	0	0	0.9975848227793687	right
X	18616619	C	T	Pkinase:3579	missense_variant	5	0.0	CDKL5	0.6242	0.7757	T288I	1	X:18616619:C:T	True	True	1.0	2.0	0.0002330187580100198	0.0	0	0	0.9919188540099934	right
X	18622374	C	T	none399732,none399733,none399734	missense_variant	2	0.0	CDKL5	1.021	0.7952	R444C	0	X:18622374:C:T	True	True	0.875	20.0	0.0009320750320400792	0.0001165093790050099	0	1	0.8173181194585402	vus
X	18622426	A	G	none399732,none399733,none399734	missense_variant	3	0.0	CDKL5	0.2747	0.8009	N461S	0	X:18622426:A:G	True	True	0.875	20.0	0.0009320750320400792	0.0001165093790050099	0	1	0.4796665080669864	vus
X	18622936	T	C	none399732,none399733,none399734	missense_variant	3	0.0	CDKL5	0.4361	0.7595	I631T	0	X:18622936:T:C	True	True	0.875	20.0	0.0009320750320400792	0.0001165093790050099	0	1	0.5979838904068911	vus
X	18638018	C	A	none399732,none399733,none399734	missense_variant	2	0.0	CDKL5	0.4624	0.8269	Q770K	0	X:18638018:C:A	True	True	0.875	20.0	0.0009320750320400792	0.0001165093790050099	0	1	0.6147835444229702	vus
X	18638082	A	C	none399732,none399733,none399734	missense_variant	2|2	0.016689	CDKL5	0.5201	0.7917	Q791P	0	X:18638082:A:C	True	True	0.875	20.0	0.0009320750320400792	0.0001165093790050099	0	1	0.6489857498365071	vus
X	18643260	G	A	none399732,none399733,none399734	missense_variant	2	0.0	CDKL5	0.344	0.779	D797N	0	X:18643260:G:A	True	True	0.875	20.0	0.0009320750320400792	0.0001165093790050099	0	1	0.5334246536738878	vus
X	18668628	G	A	none399742,none399743,none399744	missense_variant	3	0.0	CDKL5	0.3288	0.7122	V966I	0	X:18668628:G:A	True	True	0.0	6.0	0.0	0.00034952813701502974	0	1	0.03533173653880544	right
X	18671555	T	G	none399742,none399743,none399744	missense_variant	3	0.0	CDKL5	1.1232	0.7656	F995C	0	X:18671555:T:G	True	True	0.0	6.0	0.0	0.00034952813701502974	0	1	0.030662233037741512	right
X	18671566	G	A	none399742,none399743,none399744	missense_variant	2|2	0.0339	CDKL5	0.7839	0.7839	V999M	0	X:18671566:G:A	True	True	0.0	6.0	0.0	0.00034952813701502974	0	1	0.03273037882937188	right
X	18671579	T	C	none399742,none399743,none399744	missense_variant	0|3	0.0	CDKL5	0.4206	0.7684	M1003T	0	X:18671579:T:C	True	True	0.0	6.0	0.0	0.00034952813701502974	0	1	0.03494808116803406	right
X	99551322	T	G	none406716,none406717,none406718	missense_variant	2	0.004238399999999999	PCDH19	0.5226	0.7663	N1087H	0	X:99551322:T:G	True	True	0.07692307692307693	27.0	0.00011899095668729176	0.004402665397429796	0	1	0.006092381746924731	right
X	99551595	T	A	none406716,none406717,none406718	missense_variant	3	0.0007947	PCDH19	0.8173	0.7537	I996F	0	X:99551595:T:A	True	True	0.07692307692307693	27.0	0.00011899095668729176	0.004402665397429796	0	1	0.010025076951617017	right
X	99661572	A	C	none406716,none406717,none406718	missense_variant	3	0.0	PCDH19	0.8429	0.7488	V675G	0	X:99661572:A:C	True	True	0.07692307692307693	27.0	0.00011899095668729176	0.004402665397429796	0	1	0.010434268692096505	right
X	99661719	G	A	Cadherin:1194	missense_variant	3	0.0	PCDH19	1.4666	0.7679	T626I	0	X:99661719:G:A	True	True	0.75	8.0	0.00047596382674916705	0.00011899095668729176	0	0	0.7856082796262203	vus
X	99661914	G	C	none406719,none406720,none406721	missense_variant	5	0.0	PCDH19	1.4702	0.7143	P561R	1	X:99661914:G:C	True	True	1.0	3.0	0.0003569728700618753	0.0	0	1	0.9990370360410687	right
X	99661925	G	C	none406719,none406720,none406721	missense_variant	5	0.0	PCDH19	1.5363	0.71	N557K	1	X:99661925:G:C	True	True	1.0	3.0	0.0003569728700618753	0.0	0	1	0.9991940063265444	right
X	99662266	T	C	Cadherin:1196	missense_variant	3	0.0	PCDH19	1.3537	0.7826	T444A	0	X:99662266:T:C	True	True	0.75	7.0	0.00047596382674916705	0.0005949547834364588	0	0	0.791155557162891	vus
X	99662274	A	T	Cadherin:1196	missense_variant	5	0.0	PCDH19	1.825	0.7765	V441E	1	X:99662274:A:T	True	True	0.75	7.0	0.00047596382674916705	0.0005949547834364588	0	0	0.8656594398479613	vus
X	99662901	T	A	none406728,none406729,none406730	missense_variant	4	0.0	PCDH19	2.6243	0.7491	N232I	1	X:99662901:T:A	True	True	1.0	3.0	0.0005949547834364588	0.0	0	1	0.99999063838499	right
X	99663222	T	C	none406731,none406732,none406733	missense_variant	4	0.0	PCDH19	2.0069999999999997	0.7881	N125S	1	X:99663222:T:C	True	True	1.0	8.0	0.0011899095668729176	0.0	0	1	0.998277182520805	right
X	99663372	T	C	Cadherin_2:61	missense_variant	3	0.0	PCDH19	0.9594	0.7382	N75S	0	X:99663372:T:C	True	True	0.3333333333333333	5.0	0.00011899095668729176	0.00023798191337458352	0	0	0.1338545128159004	vus
