# Supplementary figures and images for: Genetic variant pathogenicity prediction trained using disease-specific clinical sequencing data sets
Source: HighWire-hosted journal article supplement (doi:10.1101/gr.240994.118), 2019-06-24

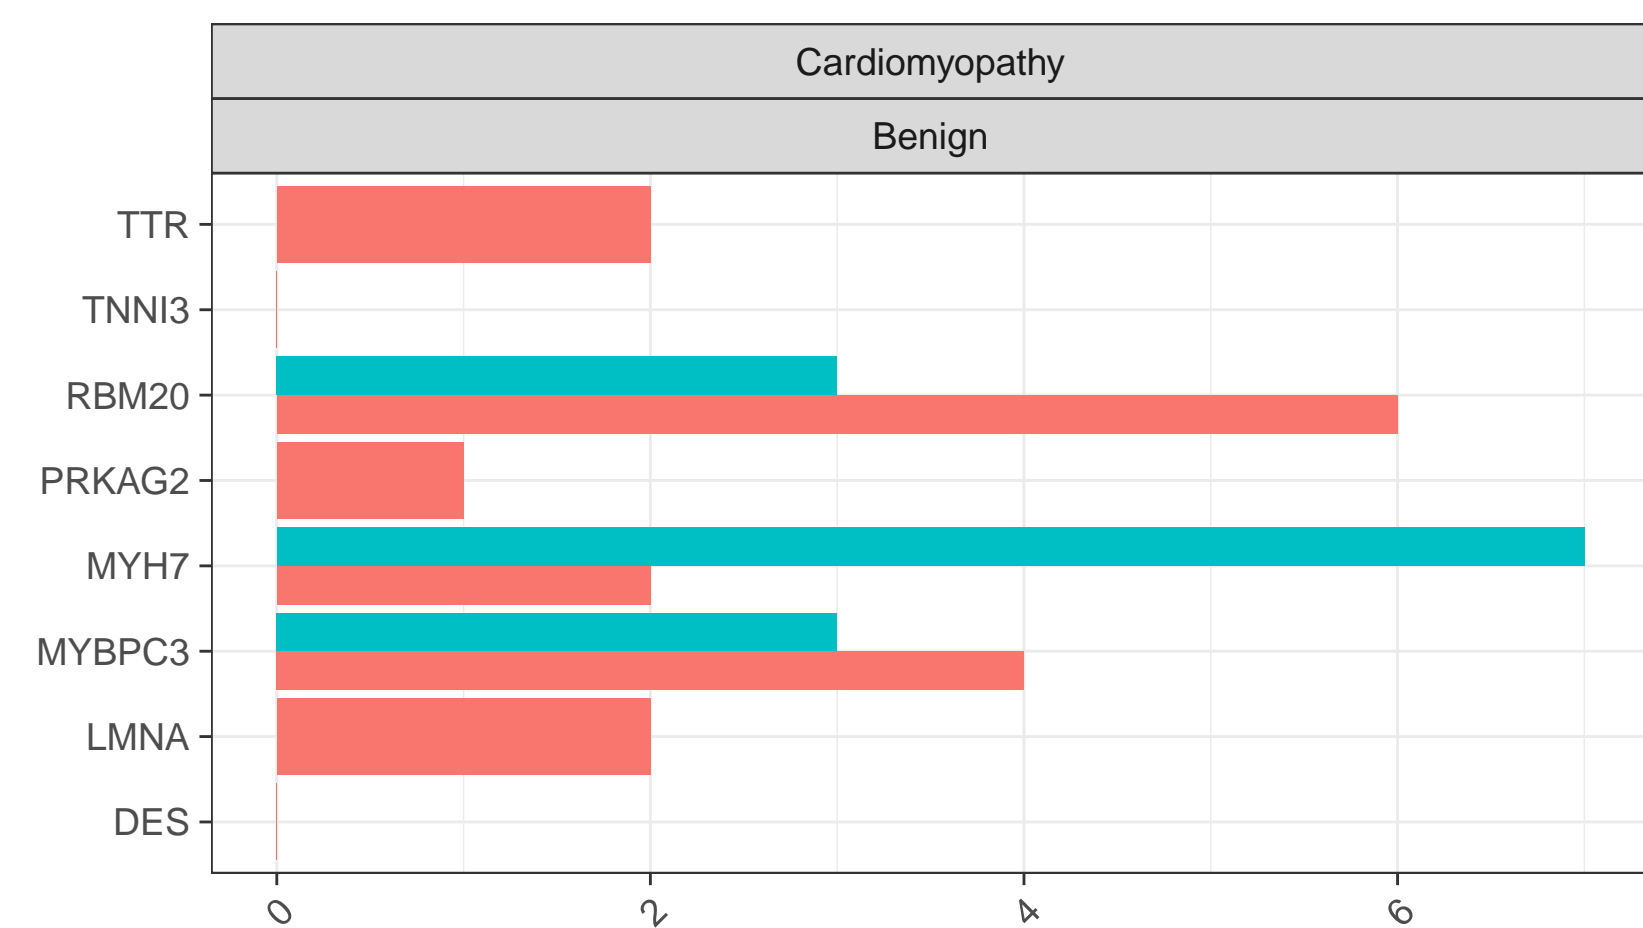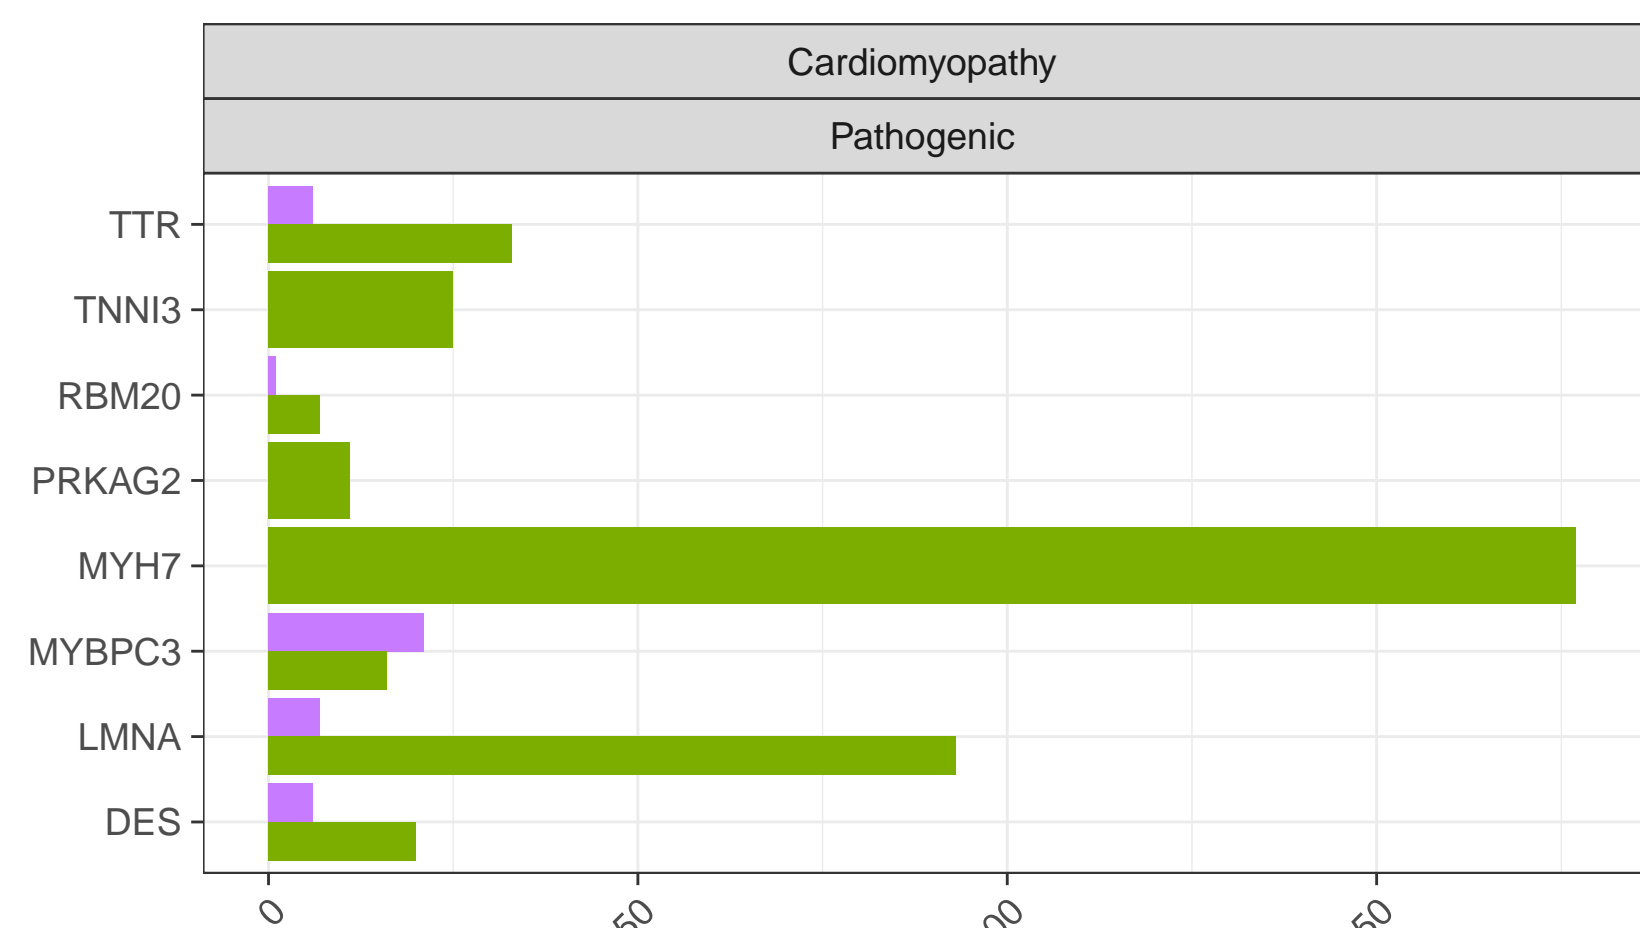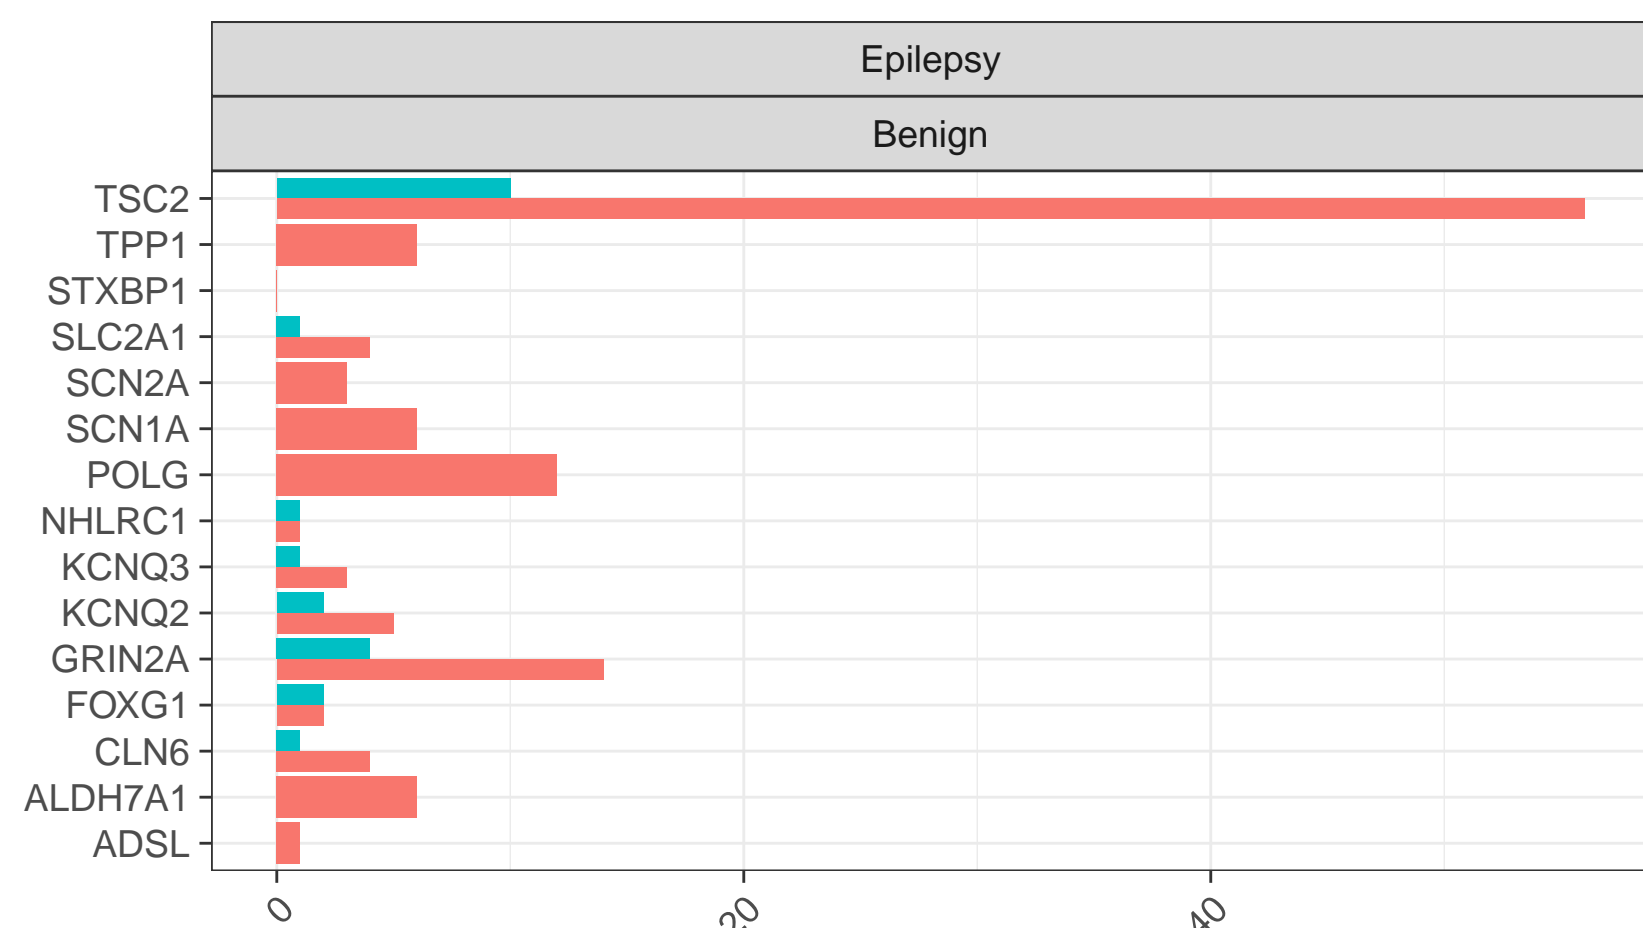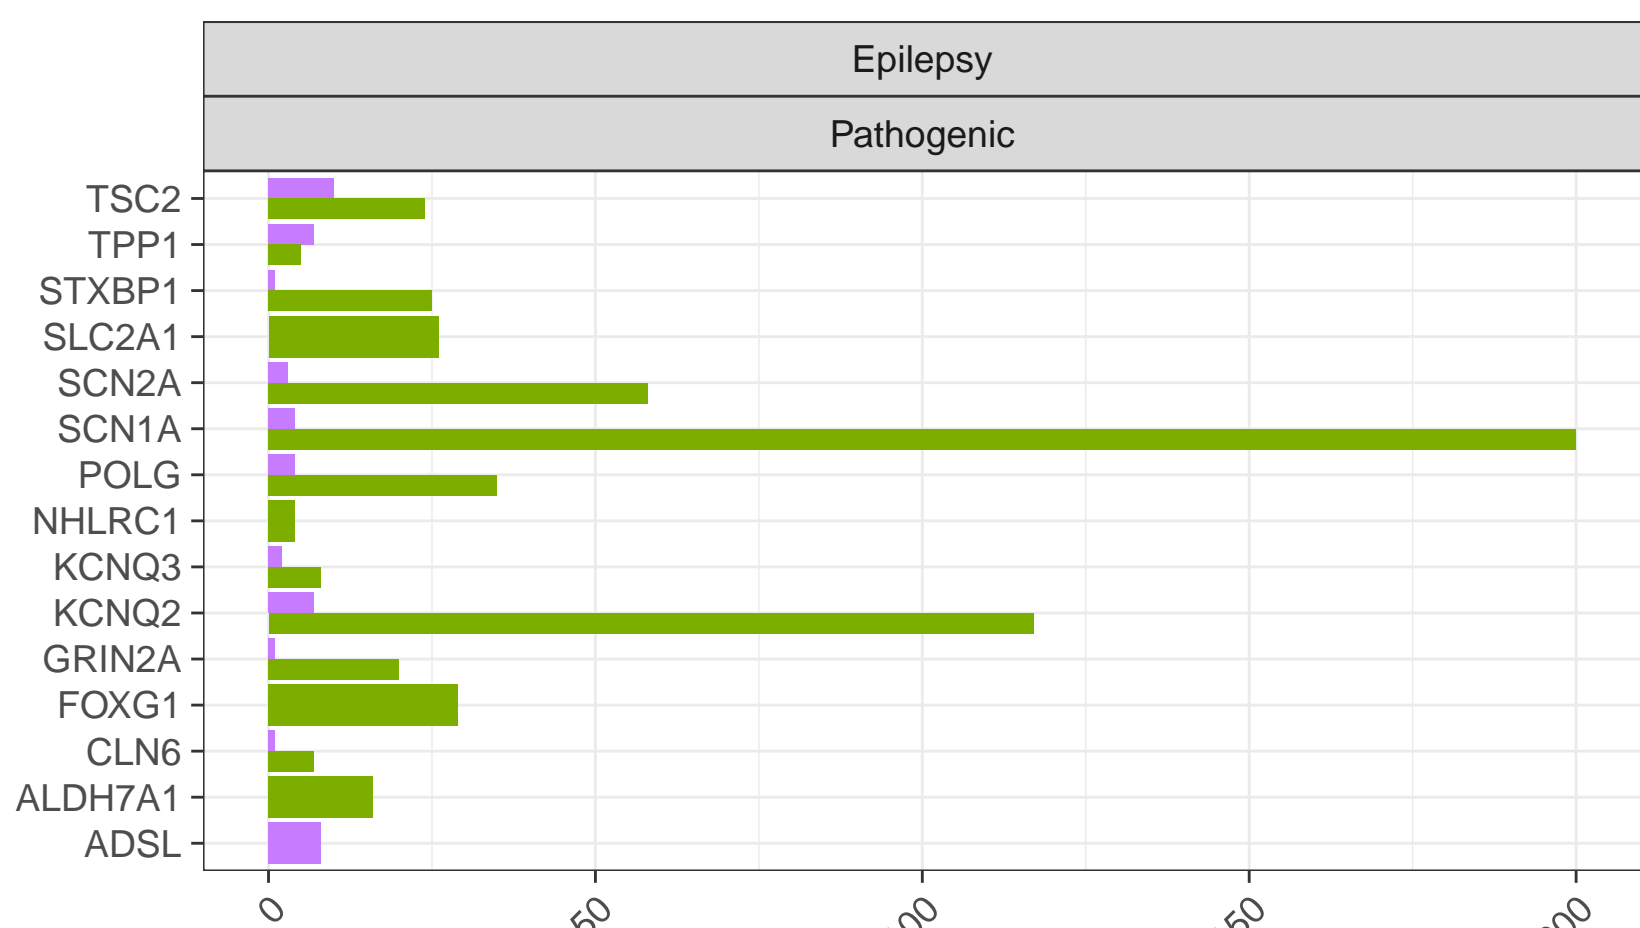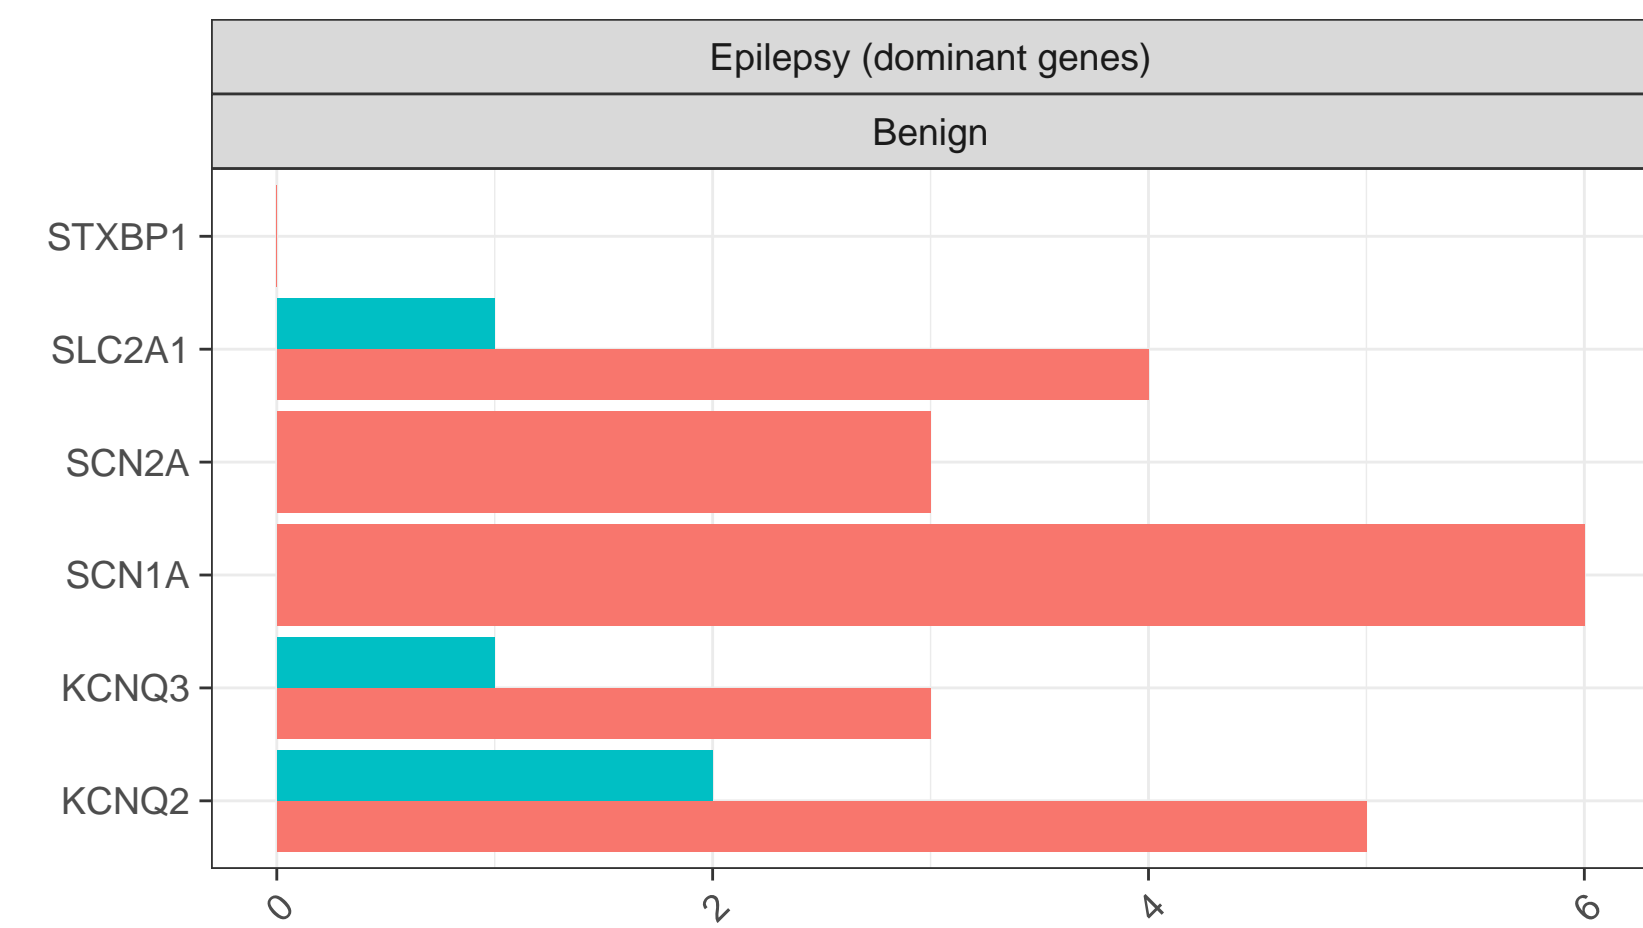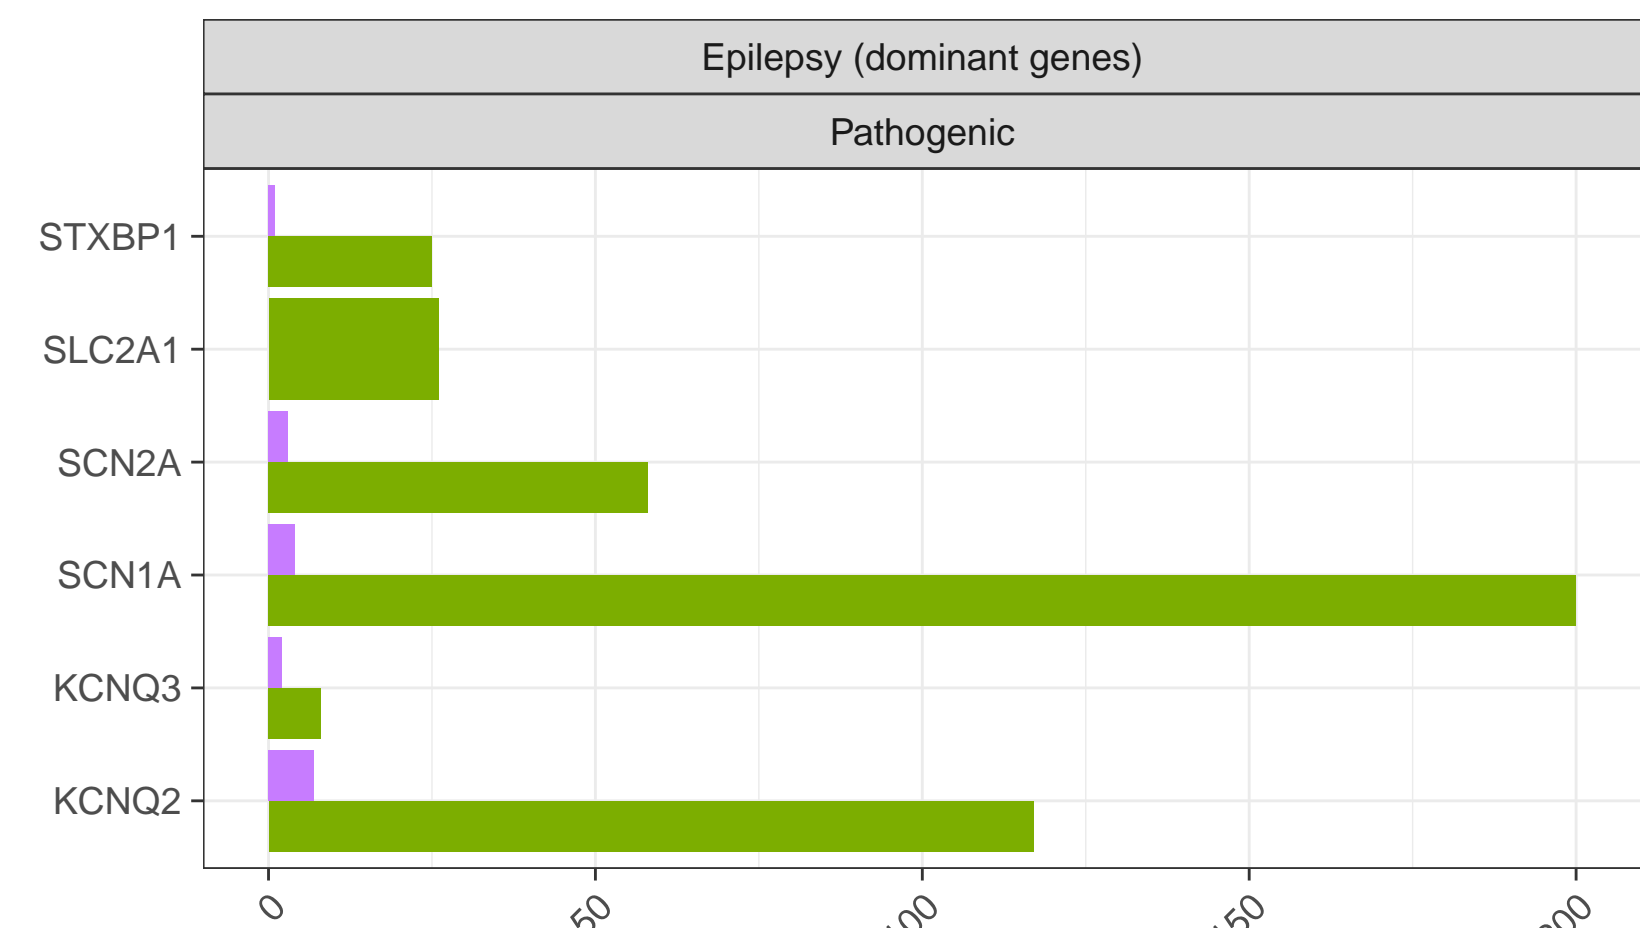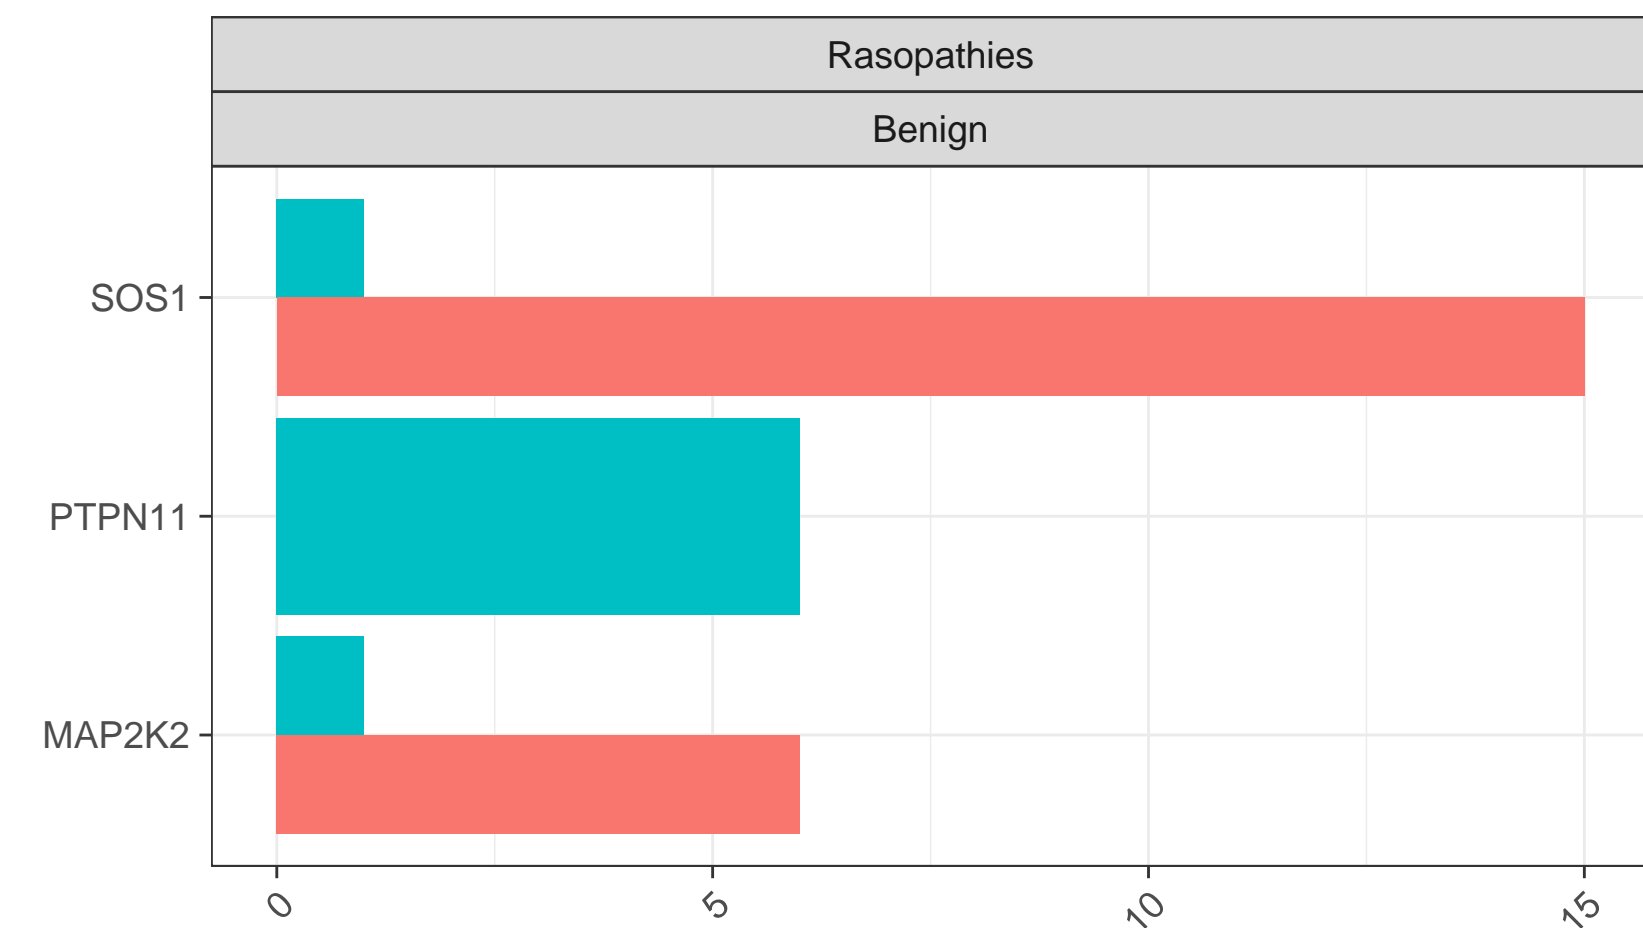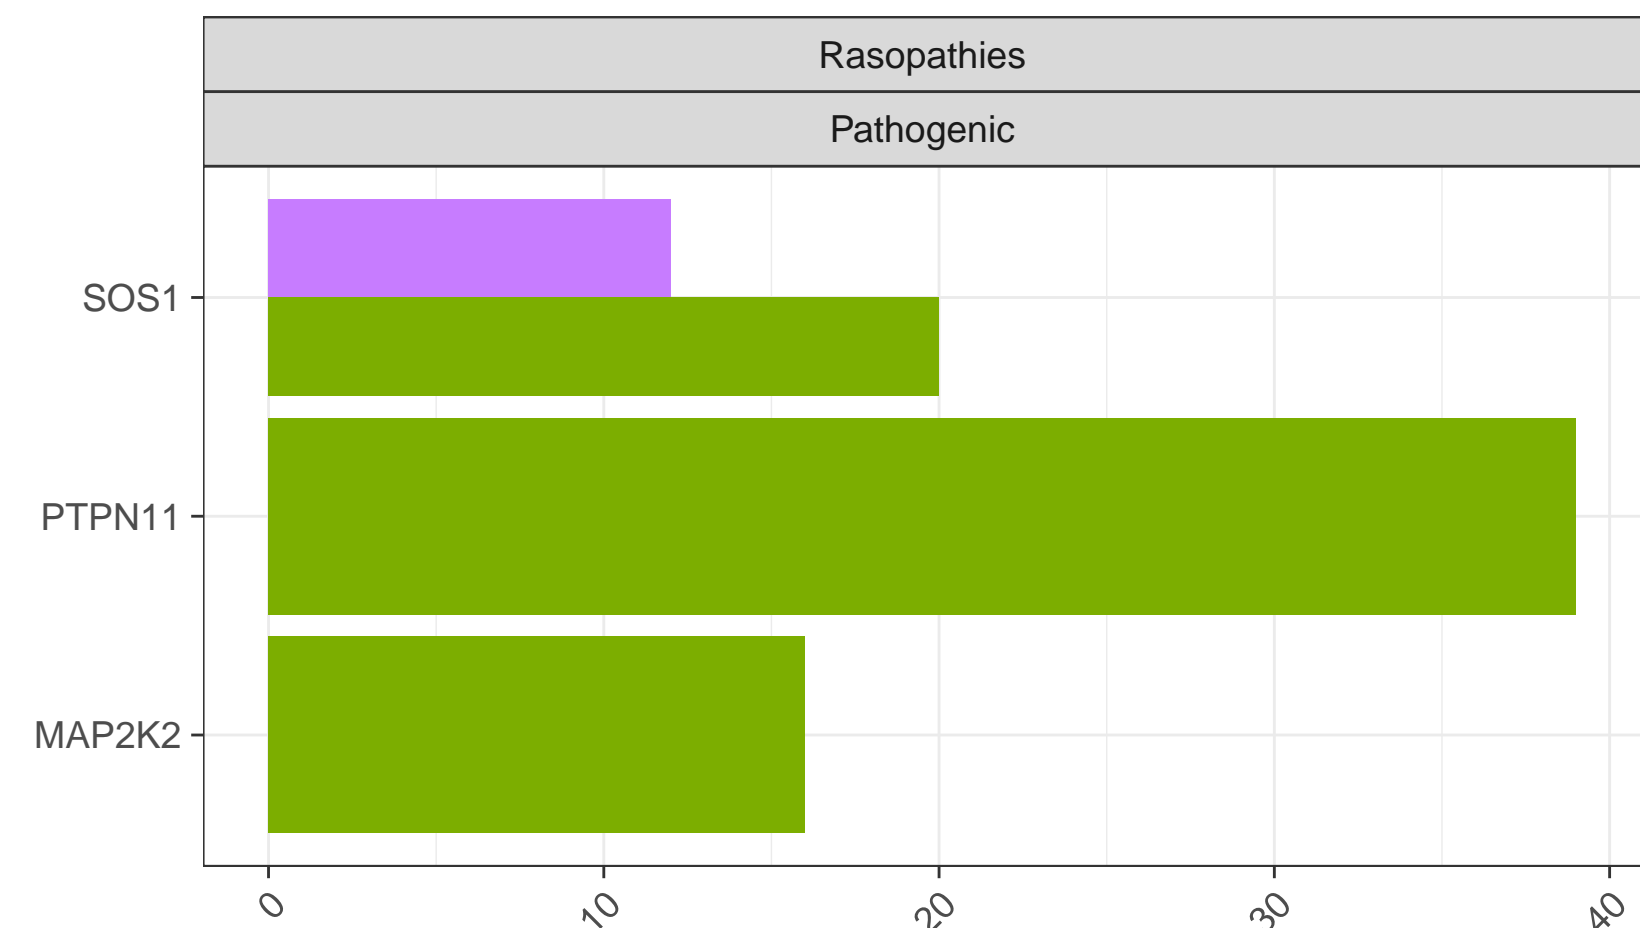

PredictionStatusMPC

- CorrectBenign
- CorrectPath
- WrongBenign
- WrongPath

Supplement: Supplemental_Code.zip [file single_gene_.003_.1.pdf › pathopredictor/docs/paper_plots/single_gene_.003_.1.pdf]

gene

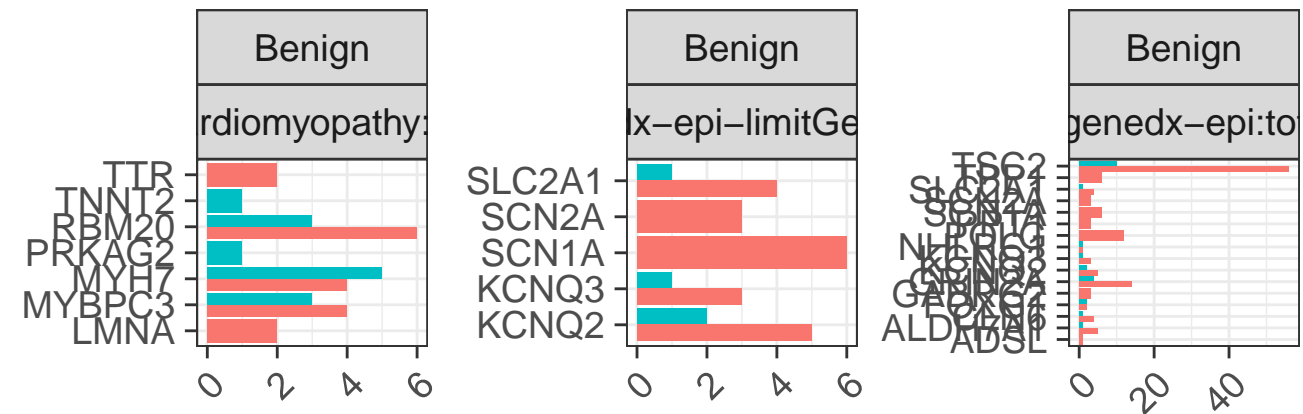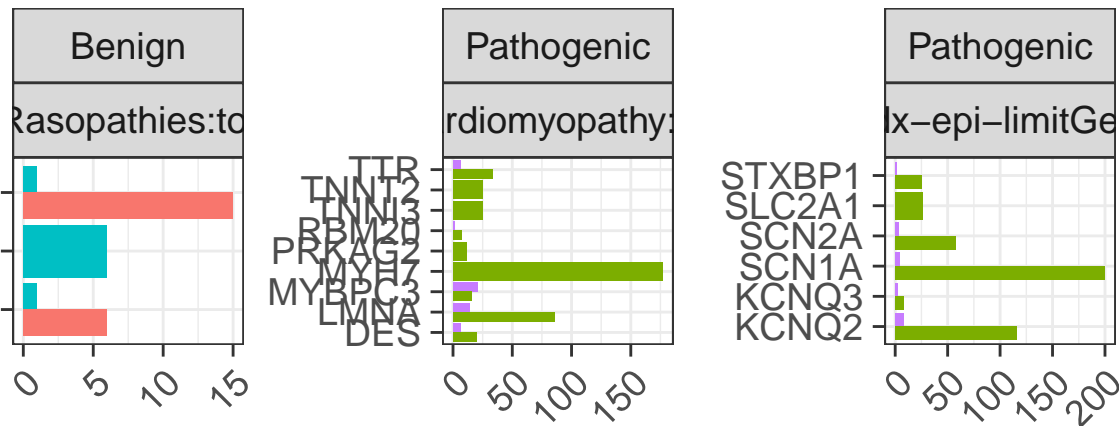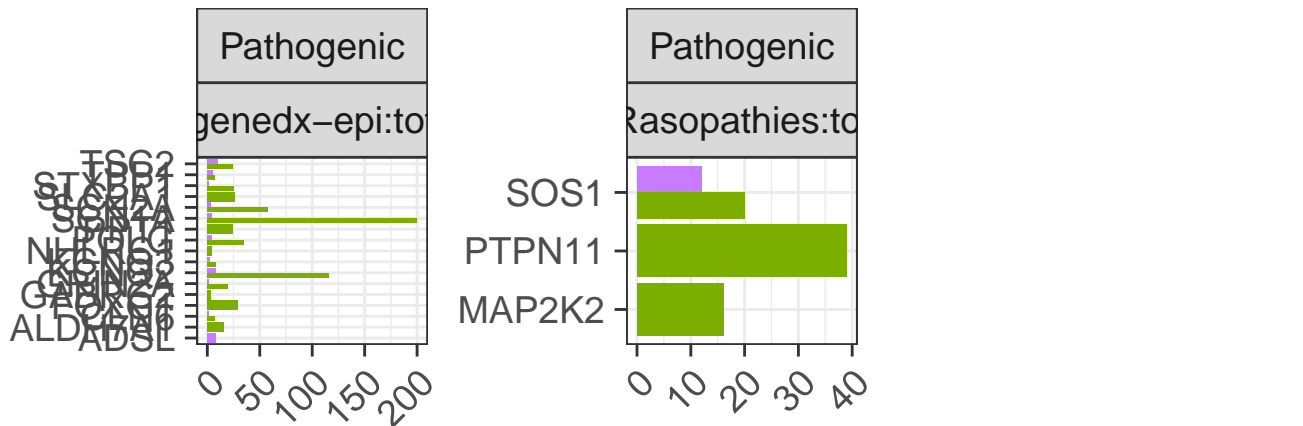

PredictionStatusMPC

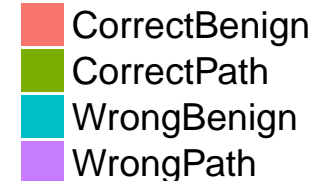

Supplement: Supplemental_Code.zip [file single_gene_.003_1.pdf › pathopredictor/docs/paper_plots/single_gene_.003_1.pdf]

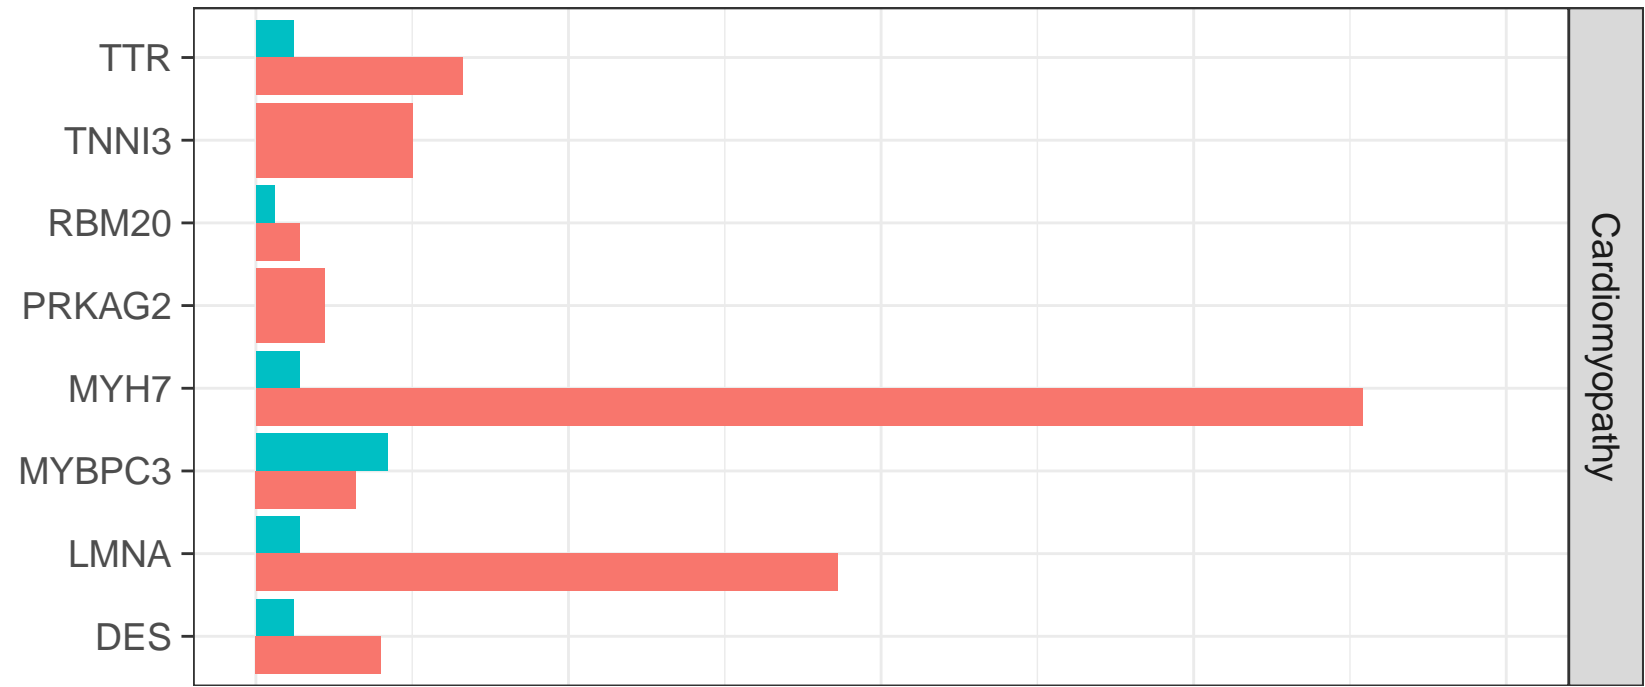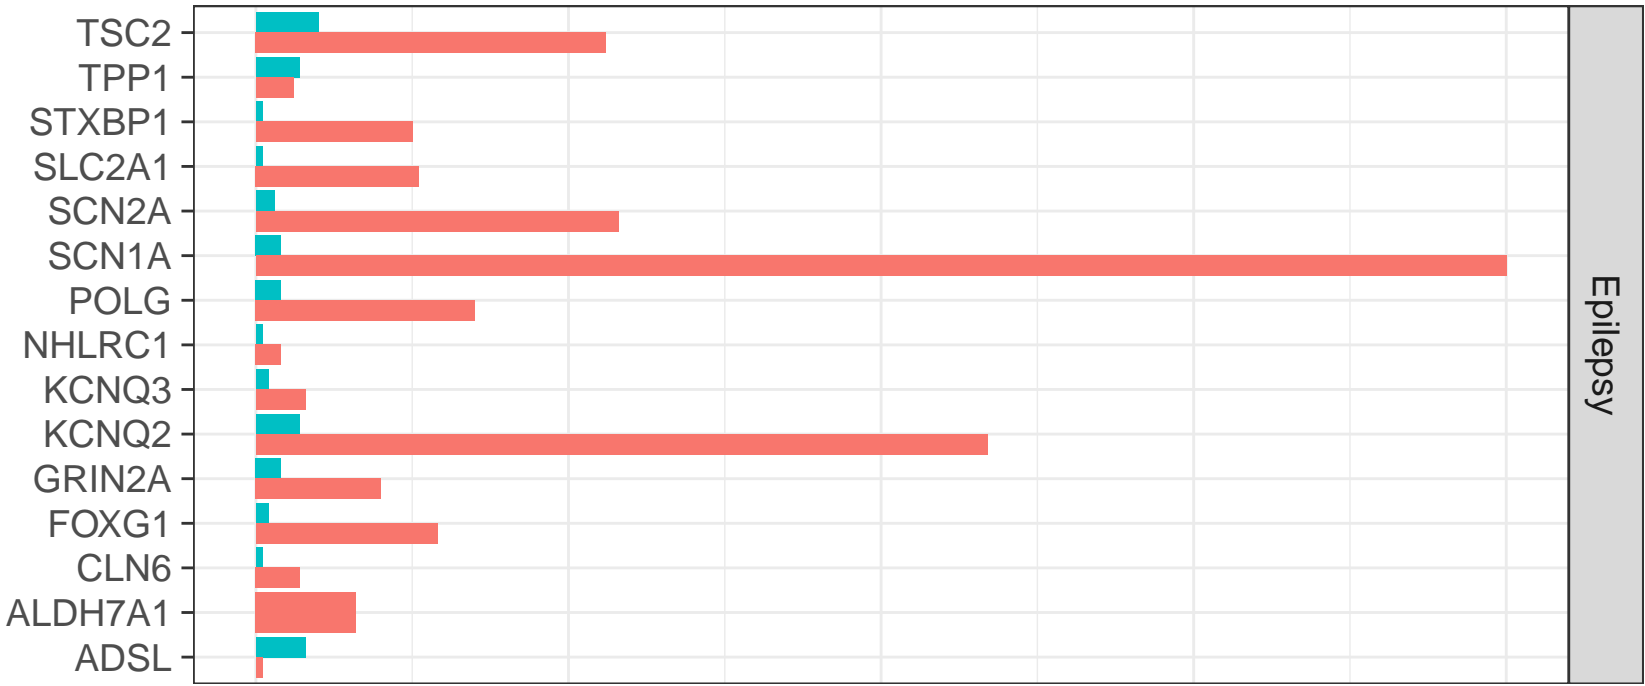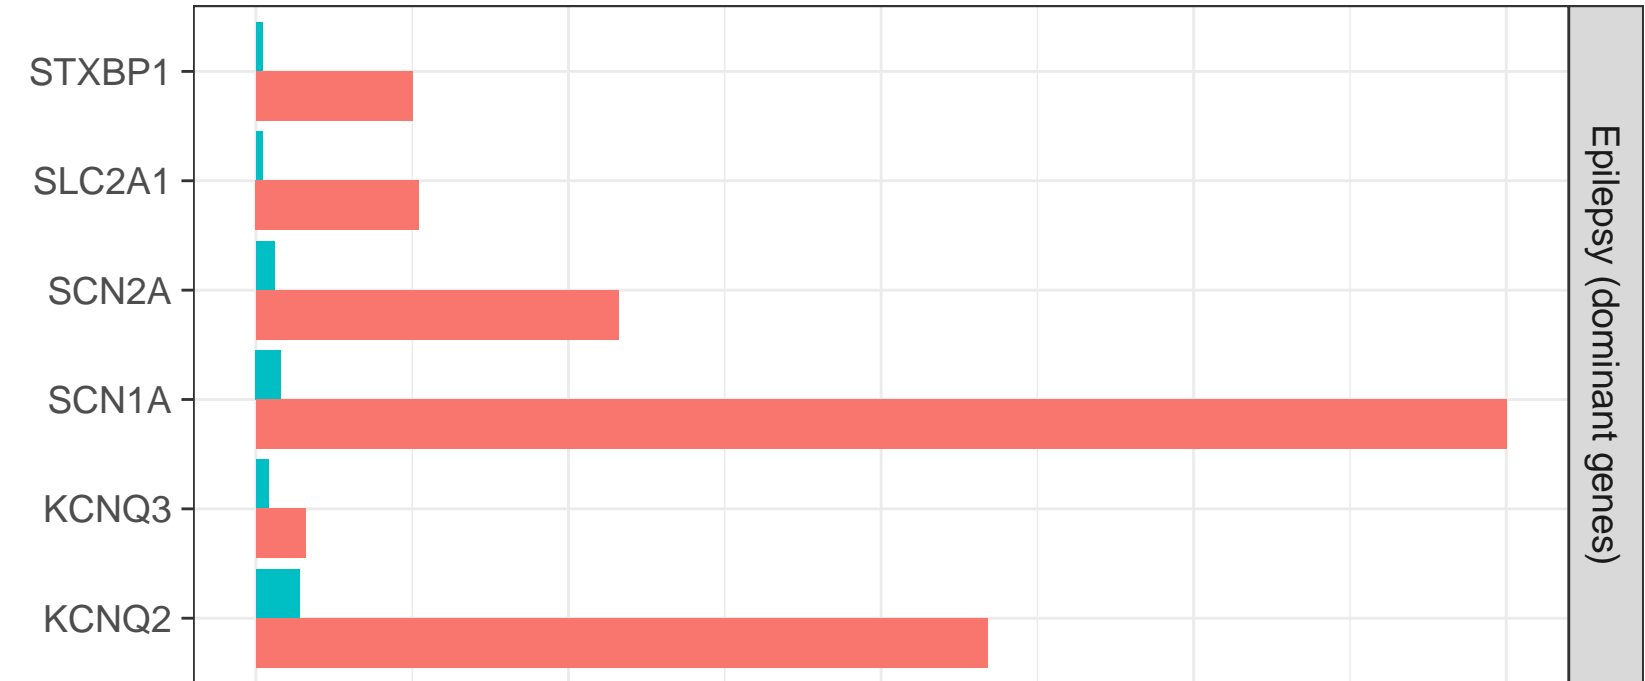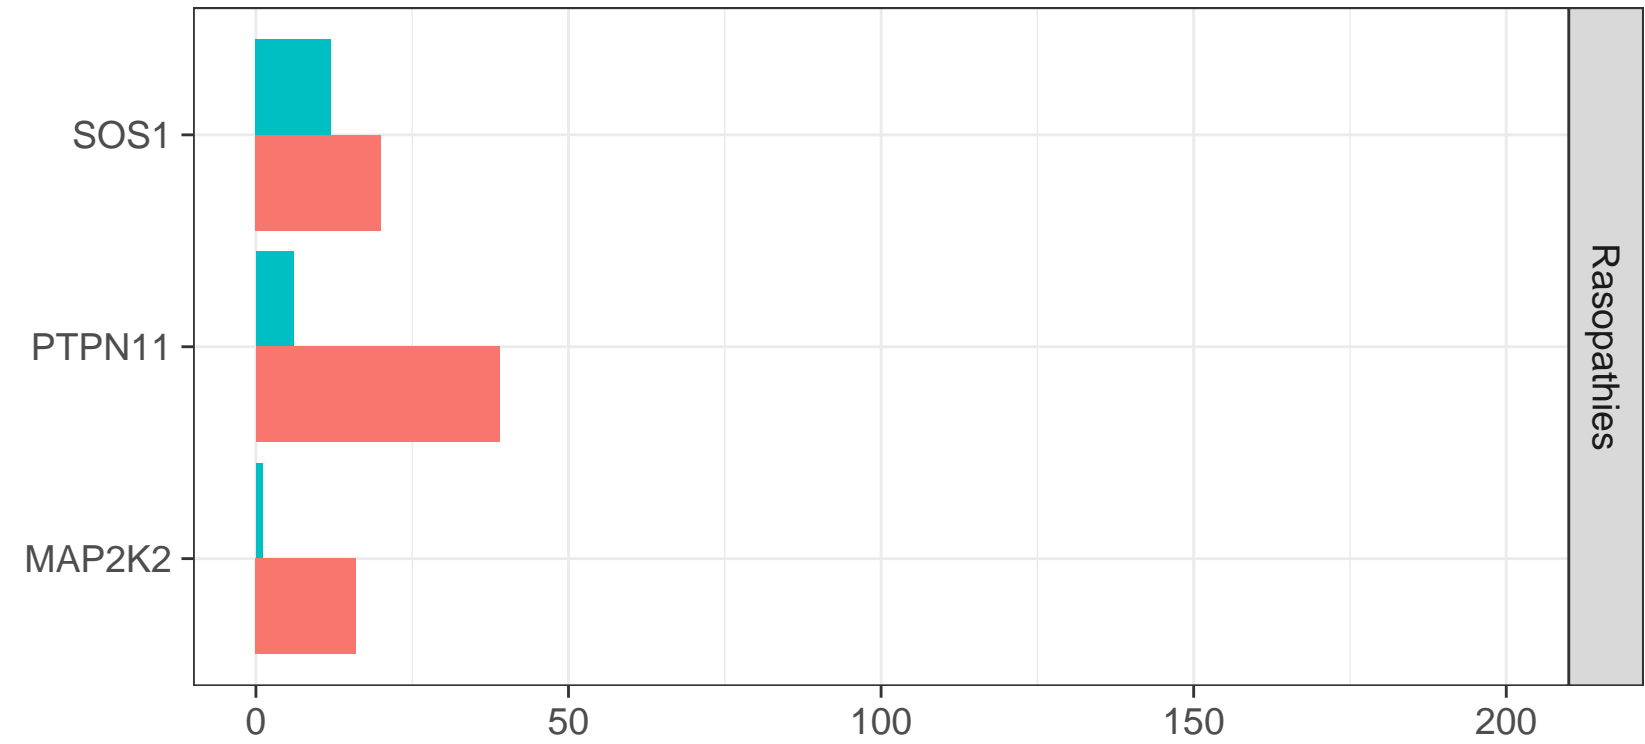

status

Correct

Wrong

Supplement: Supplemental_Code.zip [file single_gene_collapse_.003_.1.pdf › pathopredictor/docs/paper_plots/single_gene_collapse_.003_.1.pdf]

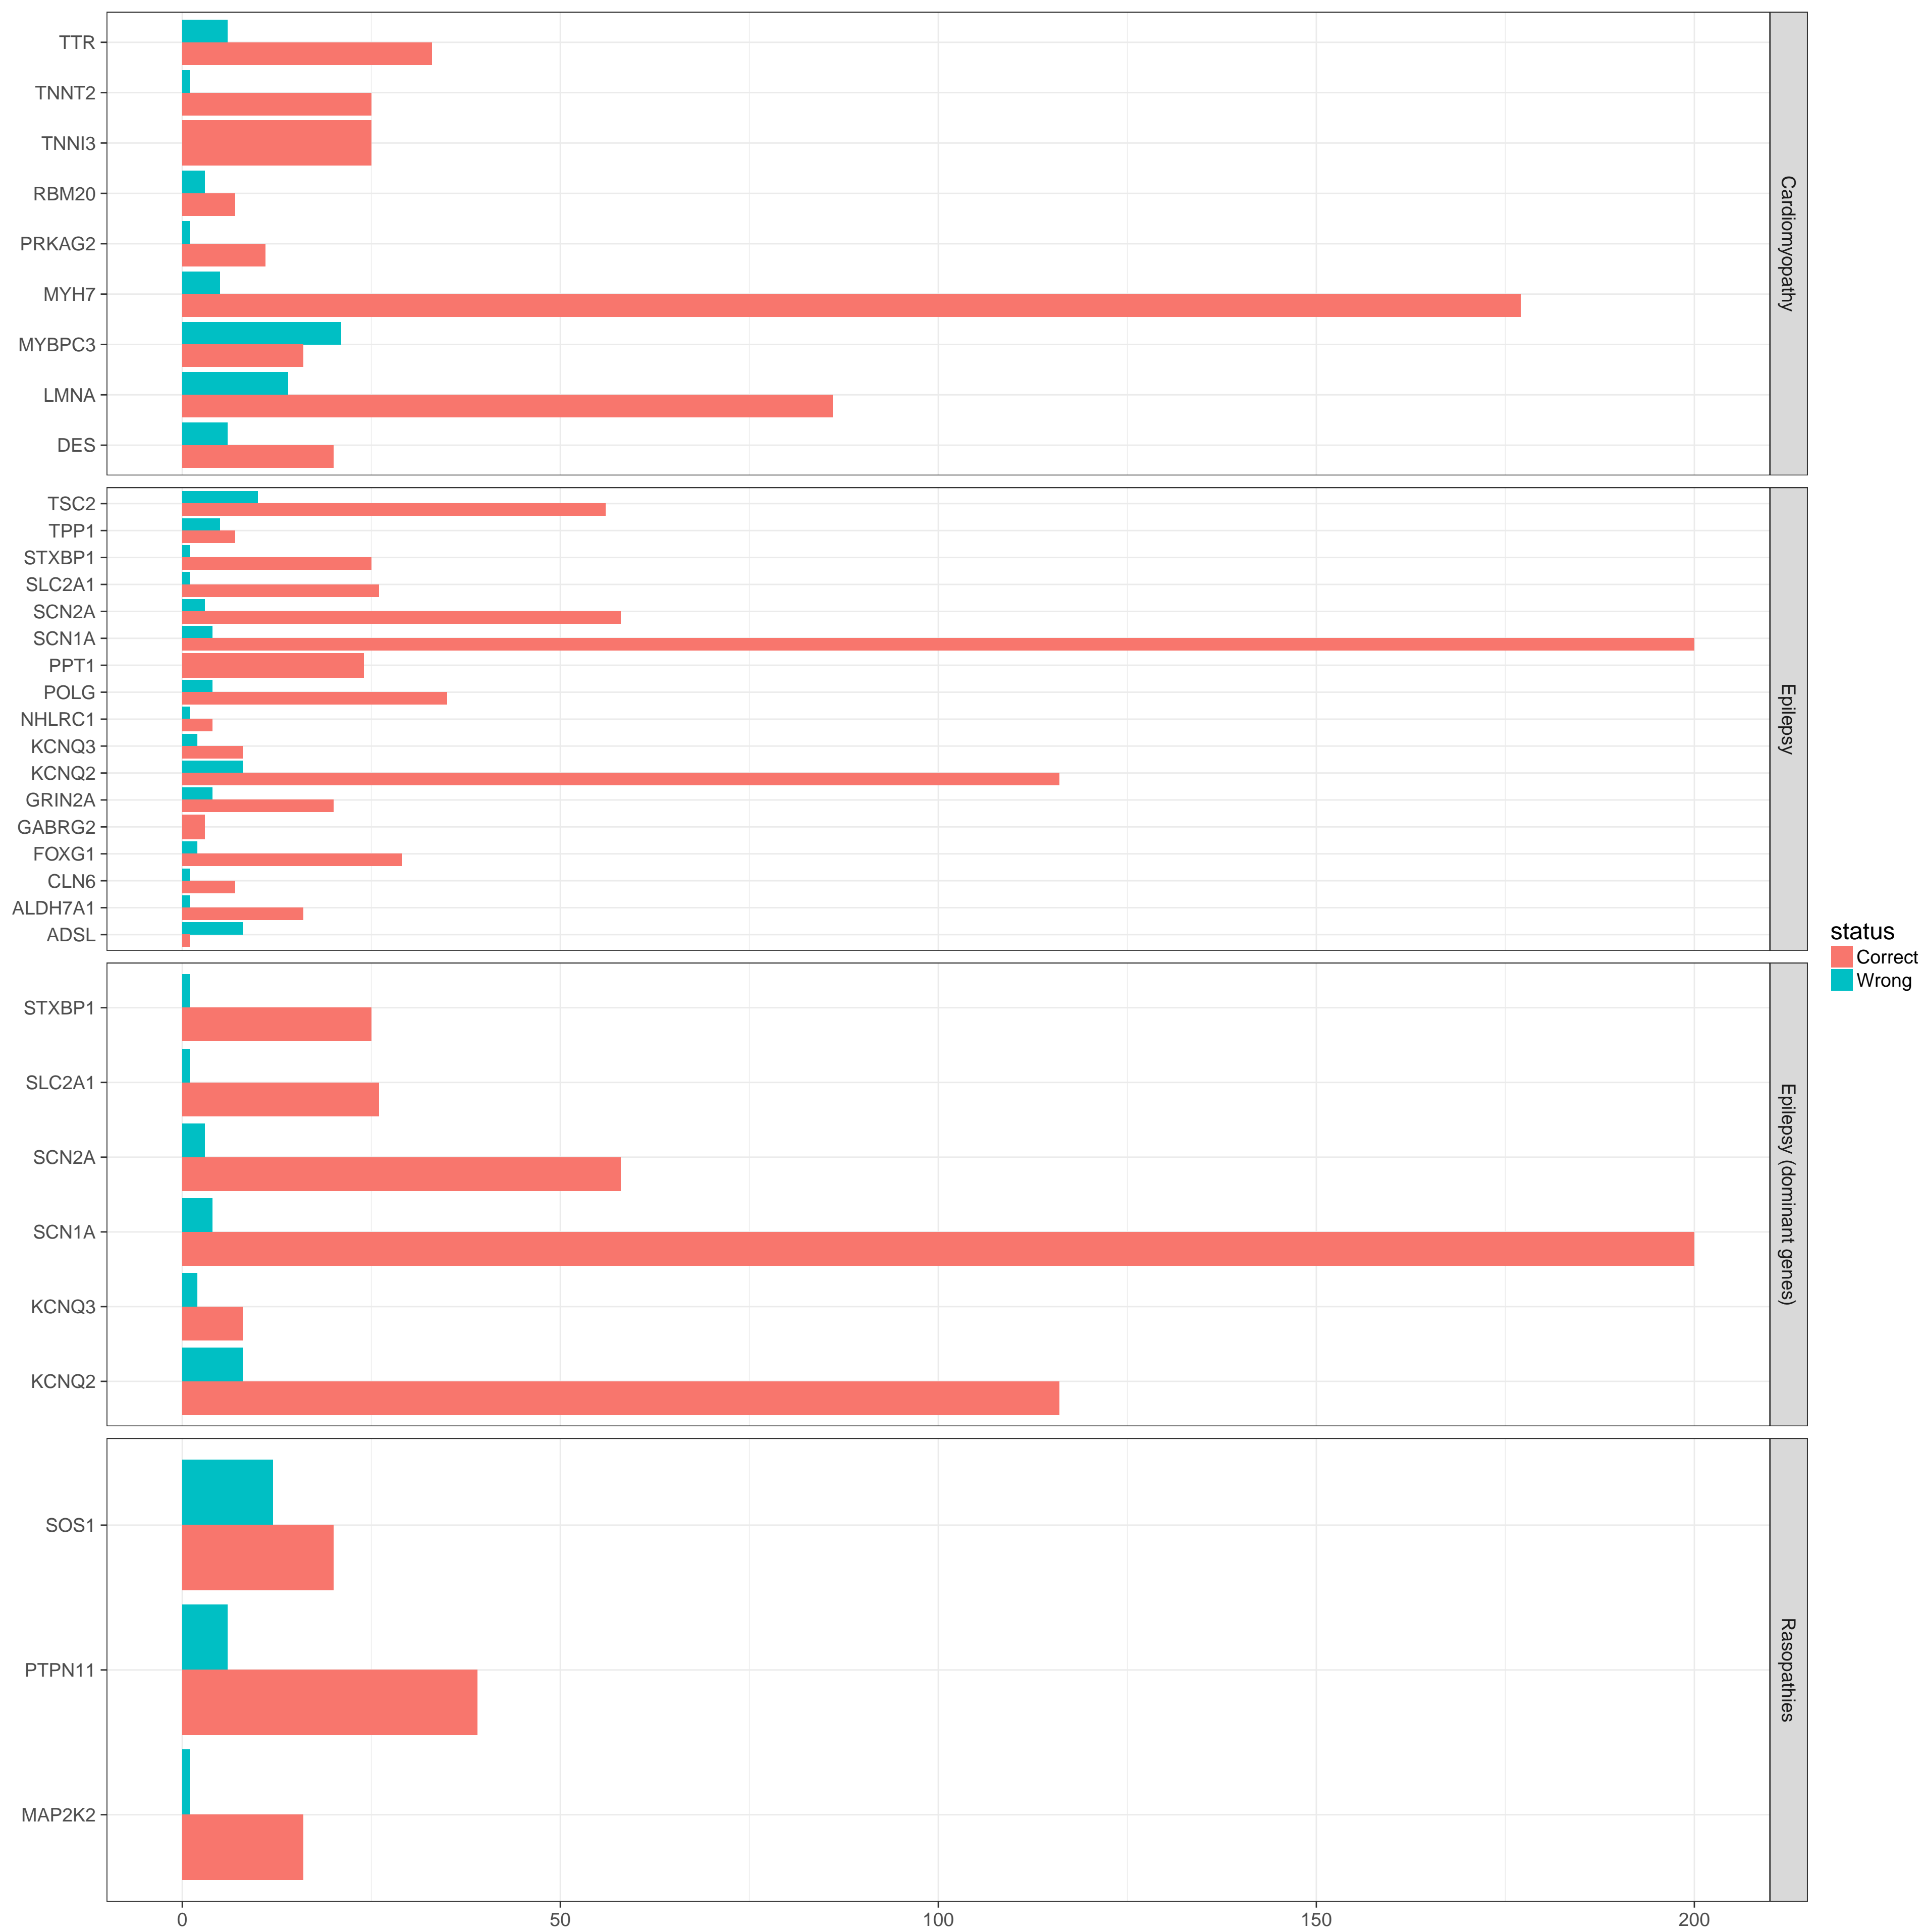

Supplement: Supplemental_Code.zip [file single_gene_collapse_.003_1.pdf › pathopredictor/docs/paper_plots/single_gene_collapse_.003_1.pdf]

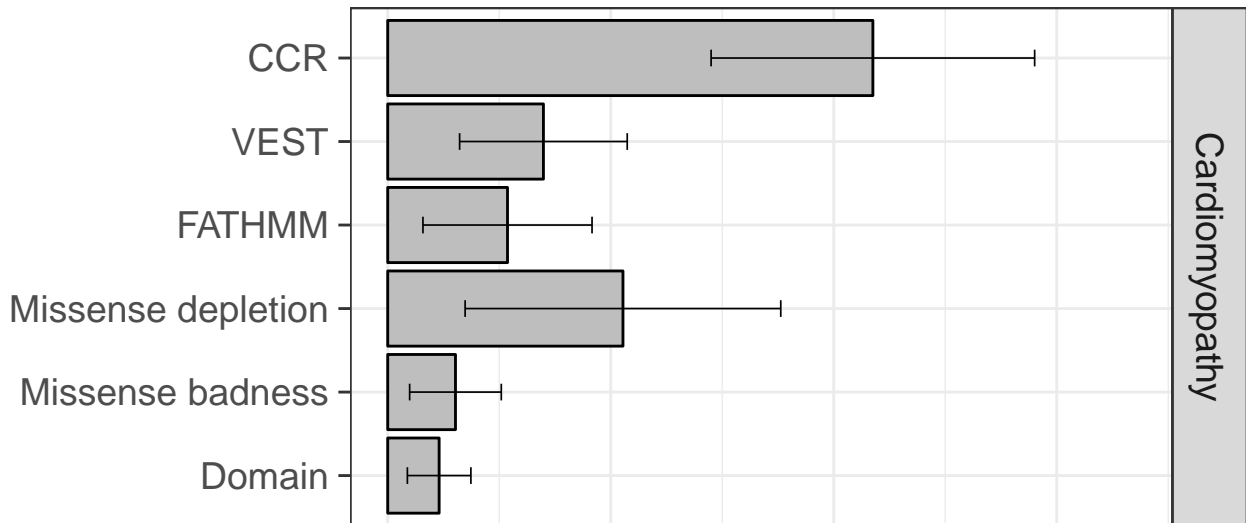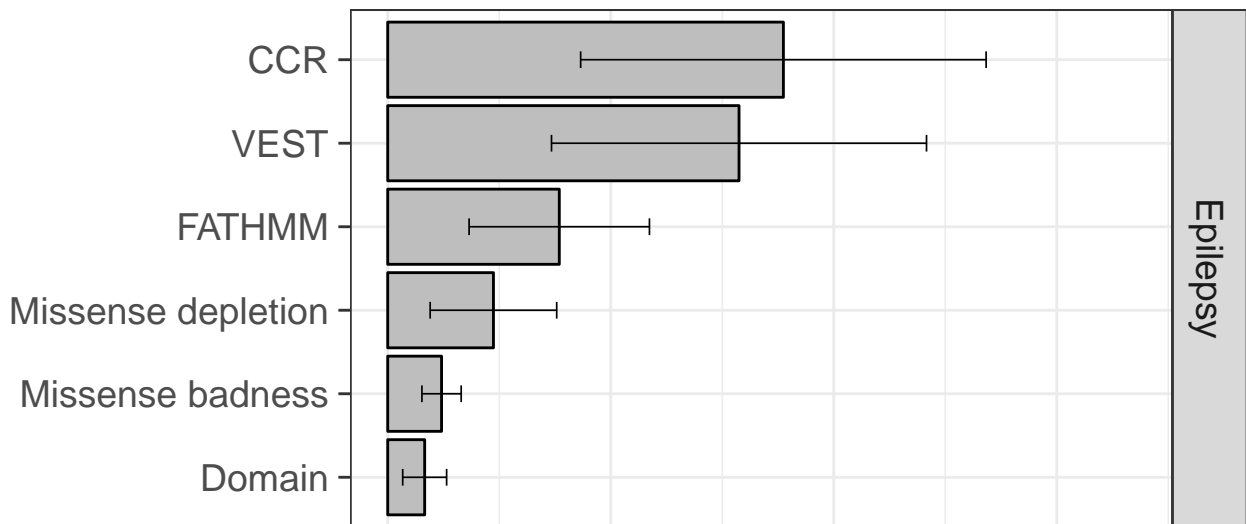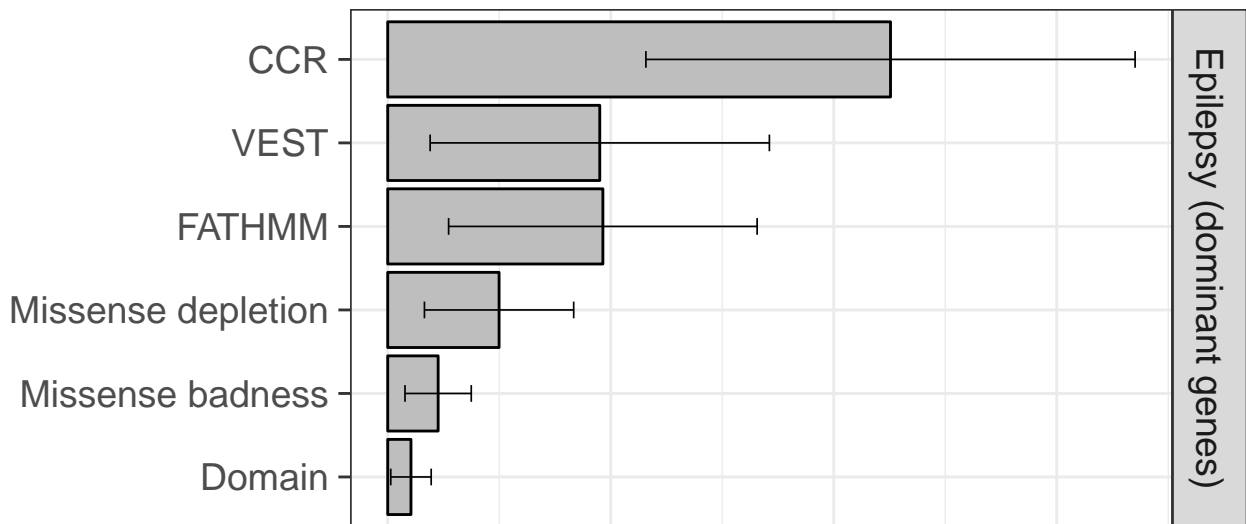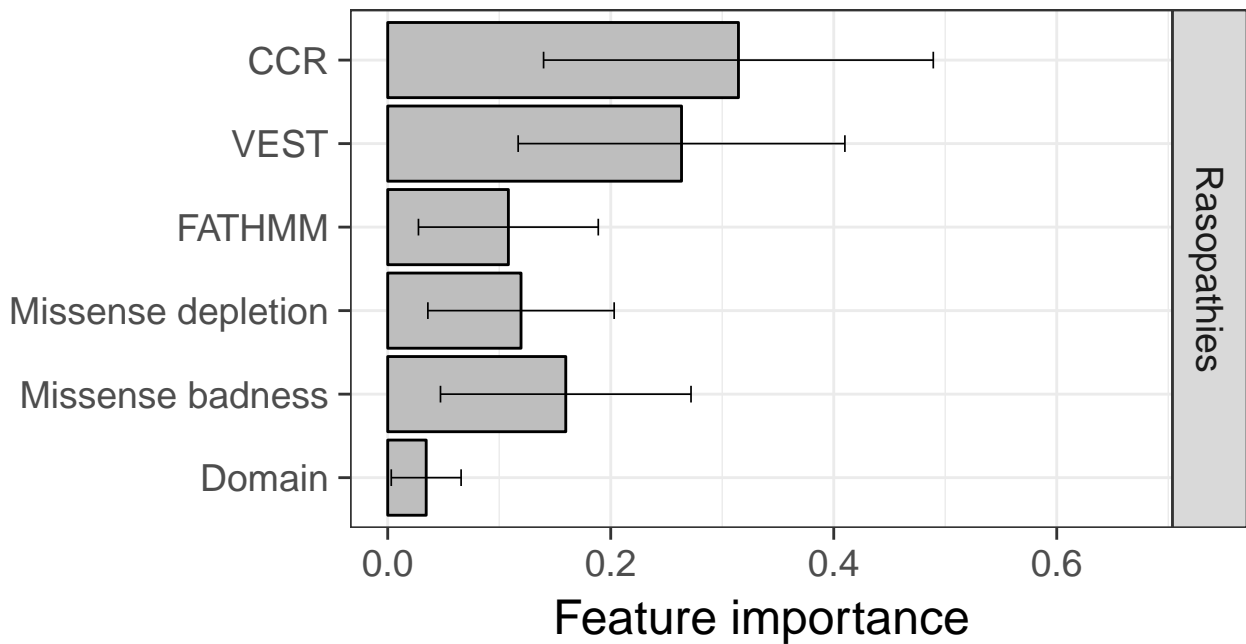

Supplement: Supplemental_Code.zip [file fig2a_featureImportance.pdf › pathopredictor/docs/paper_plts/fig2a_featureImportance.pdf]

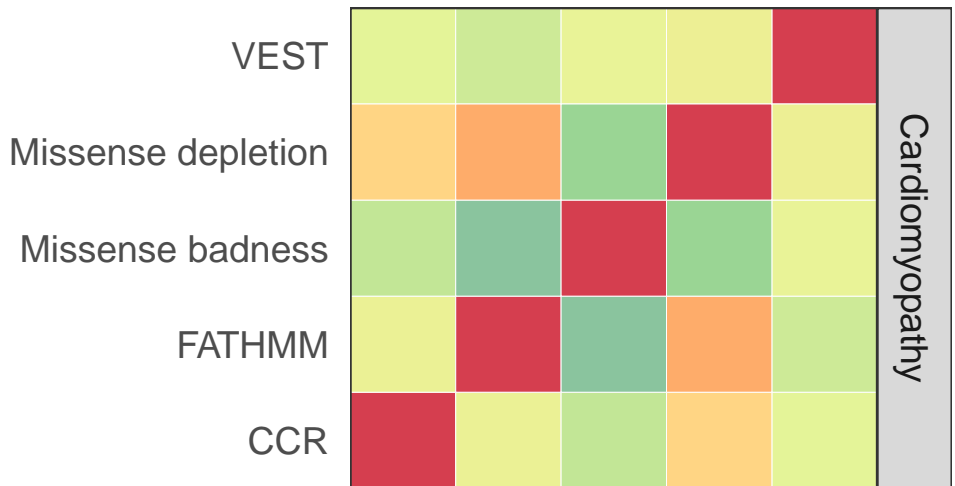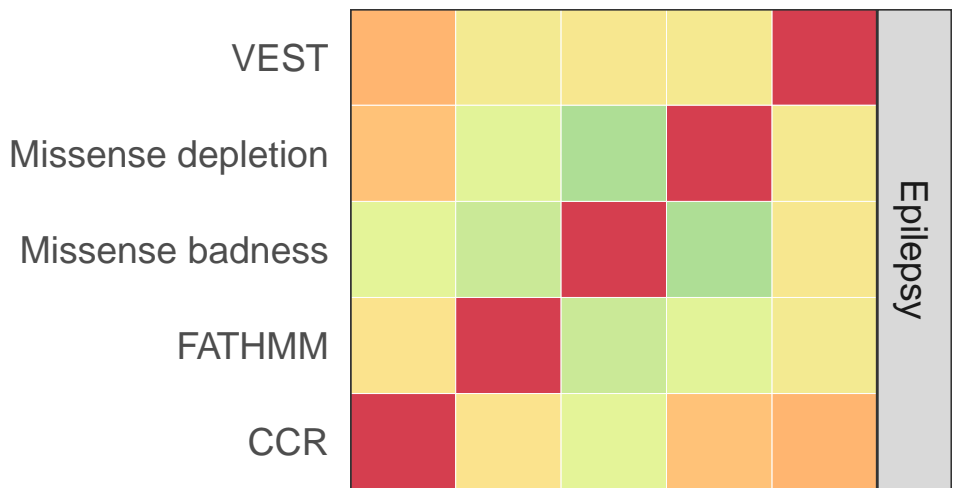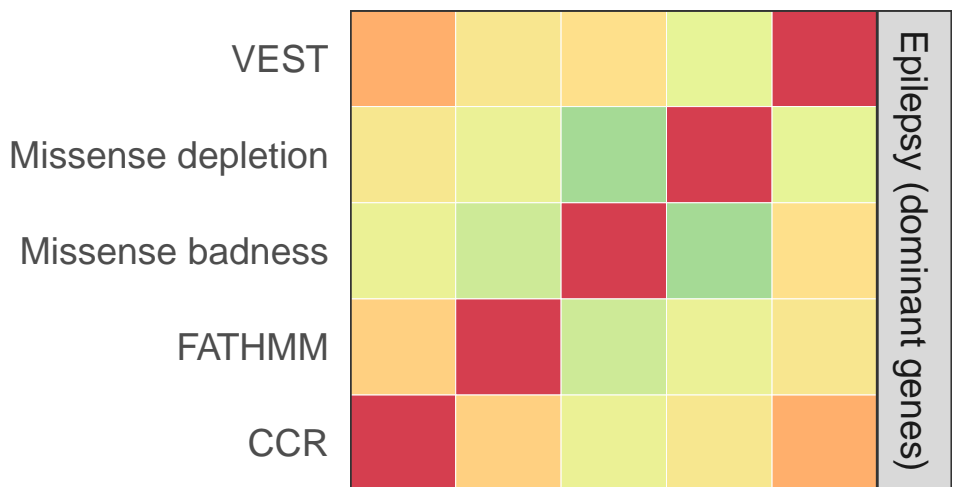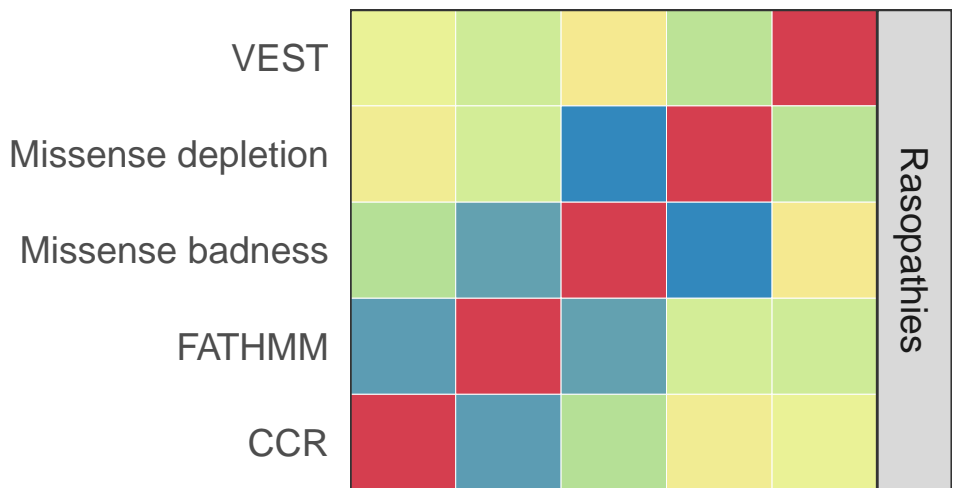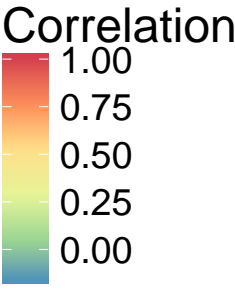

CCR FATHMM Missense badness Missense depletion VEST

Supplement: Supplemental_Code.zip [file fig2b_featureCor.pdf › pathopredictor/docs/paper_plts/fig2b_featureCor.pdf]

True positive rate

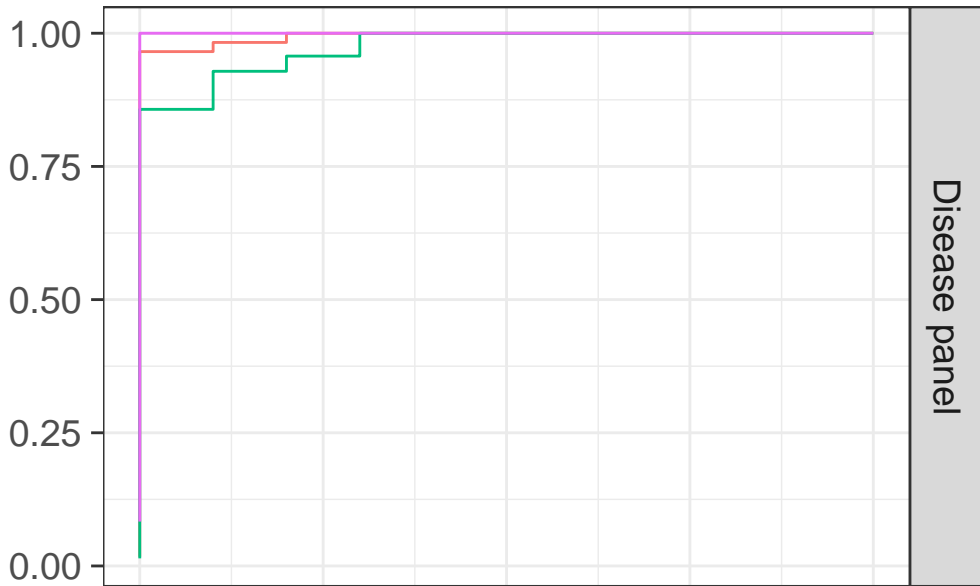

Disease panel

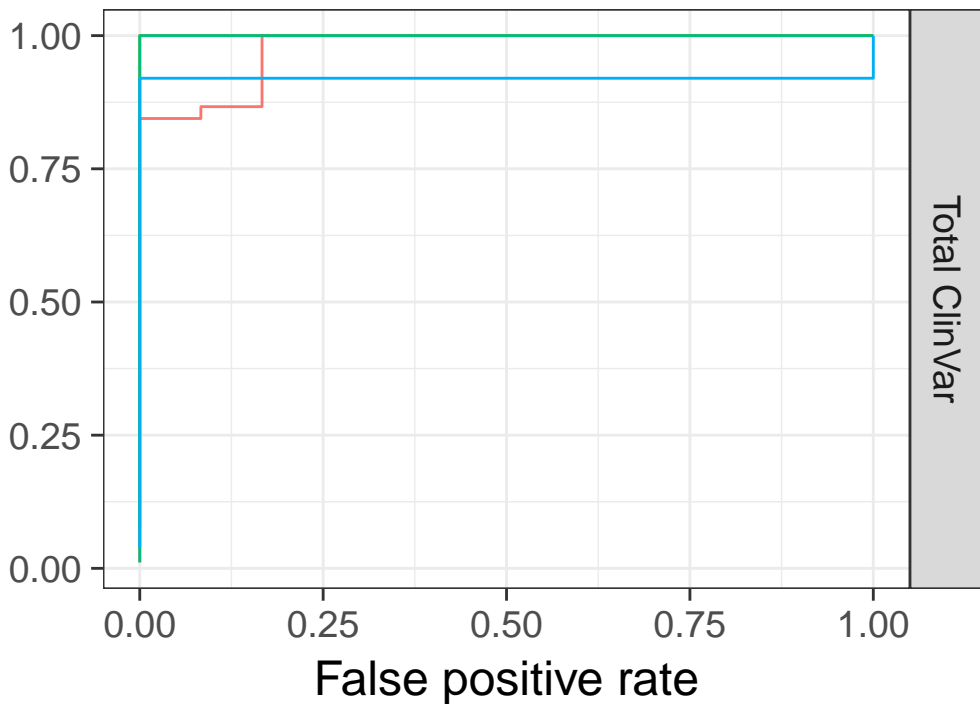

Total ClinVar

gene

- KCNQ2
- RAF1
- SCN2A
- SCN5A
- STXBP1

Supplement: Supplemental_Code.zip [file fig6_byGene.pdf › pathopredictor/docs/paper_plts/fig6_byGene.pdf]

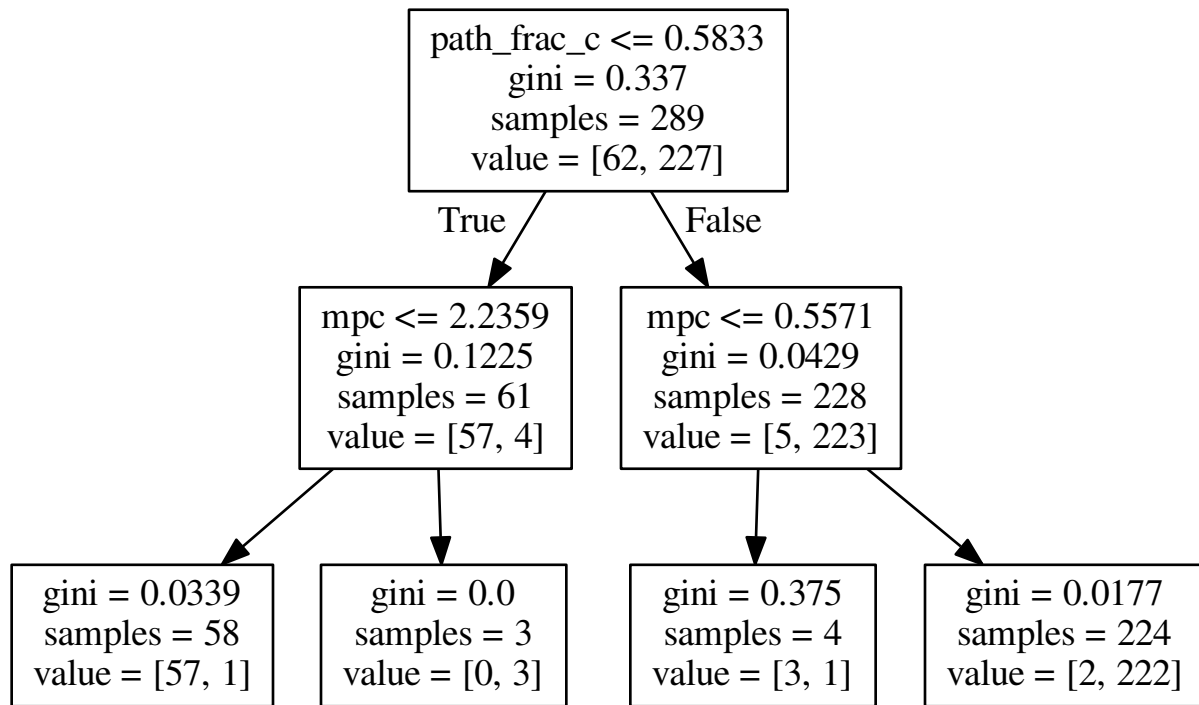

Supplement: Supplemental_Code.zip [file mtr_tree.x.pdf › pathopredictor/docs/plots/mtr_tree.x.pdf]
